1 **Innate Immune Priming by cGAS as a Preparatory Countermeasure Against**  
2 **RNA Virus Infection**

3

4 Michael T. Parker,<sup>a,b,\*</sup> Smita Gopinath,<sup>b</sup> Corey E. Perez,<sup>c,d</sup> Melissa M. Linehan,<sup>b</sup>  
5 Jason M. Crawford,<sup>a,c,d</sup> Akiko Iwasaki,<sup>b,e</sup> and Brett D. Lindenbach<sup>a,f,#</sup>

6

7 <sup>a</sup>Department of Microbial Pathogenesis, Yale University School of Medicine, New  
8 Haven, Connecticut, USA

9 <sup>b</sup>Department of Immunobiology, Yale University School of Medicine, New Haven,  
10 Connecticut, USA

11 <sup>c</sup>Department of Chemistry, Yale University, New Haven, Connecticut, USA

12 <sup>d</sup>Chemical Biology Institute, Yale University, West Haven, Connecticut, USA

13 <sup>e</sup>Howard Hughes Medical Institute, Yale University, New Haven, Connecticut, USA

14 <sup>f</sup>Department of Comparative Medicine, Yale University, New Haven, Connecticut,  
15 USA

16

17 Running Header: cGAS primes restriction of RNA viruses

18

19 #Correspondence: [brett.lindenbach@yale.edu](mailto:brett.lindenbach@yale.edu)

20 \*Present Address: Department of Biology, McDaniel College, Westminster,  
21 Maryland, USA

22

23 Word count (Abstract): 242

24 Word count (Importance): 119

25 Word count (Main Text): 6259

26 **Abstract**

27 The detection of nucleic acids by pattern recognition receptors is an ancient and  
28 conserved component of the innate immune system. Notably, RNA virus genomes  
29 are sensed by mammalian cytosolic RIG-I-like receptors, thereby activating  
30 interferon-stimulated gene (ISG) expression to restrict viral replication. However,  
31 recent evidence indicates that the cGAS-STING DNA sensing pathway also  
32 protects against RNA viruses. So far, the mechanisms responsible for DNA sensing  
33 of RNA viruses, which replicate without known DNA intermediates, remain unclear.  
34 By using cGAS gene knockout and reconstitution in human and mouse cell  
35 cultures, we discovered that DNA sensing and cGAMP synthase activities are  
36 required for cGAS-mediated restriction of vesicular stomatitis virus and Sindbis  
37 virus. The level of cGAMP produced in response to RNA virus infection was below  
38 the threshold of detection, suggesting that only transient and/or low levels of  
39 cGAMP are produced during RNA virus infections. To clarify the DNA ligands that  
40 activate cGAS activity, we confirmed that cGAS binds mitochondrial DNA in the  
41 cytosol of both uninfected and infected cells; however, the amount of  
42 cGAS-associated mitochondrial DNA did not change in response to virus infection.  
43 Rather, a variety of pre-existing cytosolic DNAs, including mitochondrial DNA and  
44 endogenous cDNAs, may serve as stimuli for basal cGAS activation. Importantly,  
45 cGAS knockout and reconstitution experiments demonstrated that cGAS drives  
46 low-level ISG expression at steady state. We propose that cGAS-STING restricts  
47 RNA viruses by promoting a preparatory immune activation state within cells, likely  
48 primed by endogenous cellular DNA ligands.

49 **Importance**

50 Many medically important RNA viruses are restricted by the cGAS-STING  
51 DNA-sensing pathway of innate immune activation. Since these viruses replicate  
52 without DNA intermediates, it is unclear what DNA ligand(s) are responsible for  
53 triggering this pathway. We show here that cGAS's DNA binding and signaling  
54 activities are required for RNA virus restriction, similar to the mechanisms by which it  
55 restricts DNA viruses. Furthermore, we confirmed that cGAS continuously binds host  
56 DNA, which was unaffected by RNA virus infection. Finally, cGAS expression  
57 correlated with the low-level expression of interferon-stimulated genes in uninfected  
58 cells, both *in vitro* and *in vivo*. We propose that cGAS-mediated sensing of  
59 endogenous DNA ligands contributes to RNA virus restriction by establishing a  
60 baseline of innate immune activation.

## 61 **Introduction**

62 A key feature of innate immunity is the detection of pathogen-associated  
63 molecular patterns (PAMPs) by pattern recognition receptors (PRRs) (1). For  
64 mammalian cells, viral nucleic acids are detected by distinct PRRs, triggering  
65 interferon-stimulated gene (ISG) expression to set up an antiviral state. During RNA  
66 virus infections, uncapped and double-stranded RNAs are detected in the cytosol by  
67 the PRRs retinoic acid-inducible gene I (RIG-I) and related RIG-I-like receptors  
68 (RLRs). However, the recent discovery of the cGAS-STING cytosolic DNA sensing  
69 pathway, and the observation that it can also restrict RNA viruses (2), reveals a need  
70 to further investigate the mechanisms of nucleic acid sensing during RNA virus  
71 infection.

72 The stimulator of interferon genes (STING) is an endoplasmic reticulum- and  
73 mitochondrial-bound protein that spontaneously activates ISG expression when  
74 overexpressed (2). Although STING is involved in DNA sensing, STING<sup>-/-</sup> mice and  
75 mouse endothelial fibroblasts (MEFs) are more permissive for vesicular stomatitis  
76 virus (VSV), a negative-strand RNA virus (2, 3). Additionally, studies in MEFs  
77 deficient in three prime repair exonuclease 1 (TREX1), a nuclease important for the  
78 turnover of cytosolic retroelement cDNAs (4), have described enhanced antiviral  
79 phenotypes in response to a wide array of RNA viruses and retroviruses,  
80 presumably due to the accumulation of DNA in the cytosol (5, 6). It appears that this  
81 DNA-based restriction is broad, as many RNA viruses have evolved mechanisms to  
82 subvert the cGAS-STING pathway, including flaviviruses (7-9), hepaciviruses (10,  
83 11), picornaviruses (3), coronaviruses (12-17), and influenza A virus (18).

84 STING does not directly interact with cytosolic DNA, but functions as an innate  
85 immune adaptor protein to transduce signals between cyclic GMP-AMP synthase  
86 (cGAS) and Tank-binding kinase 1, which subsequently phosphorylates the  
87 transcription factor interferon regulatory factor 3 (IRF3) to initiate an ISG response  
88 (19). Recent evidence also suggests that STING inhibits translation by unknown

89 mechanisms and may restrict RNA virus replication independent of IRF3 activation  
90 (20).

91 cGAS is a nucleic acid-binding protein specific for dsDNA and DNA:RNA hybrids  
92 that also has nucleotidyl transferase activity (21-24). DNA binding induces structural  
93 changes to form the cGAS active site, which synthesizes a non-canonical 5'-2'- and  
94 5'-3'-linked cyclic dinucleotide known as cyclic guanosine monophosphate-  
95 adenosine monophosphate (cGAMP) (25-28). cGAMP is a diffusible secondary  
96 messenger that specifically binds to STING with high affinity ( $K_D \sim 4$  nM), thereby  
97 inducing a downstream innate immune response (29-32).

98 For RNA viruses that replicate in the cytosol without a DNA intermediate, the  
99 specific ligands that activate cGAS remain unclear. At present, the prevailing  
100 hypothesis is that RNA viruses induce release of mitochondrial DNA (mtDNA) into  
101 the cytosol, thereby activating innate immune responses (7, 33-36). However, it is  
102 unclear whether mitochondrial damage is a conserved feature of RNA virus  
103 infection, nor is it clear that cGAS-STING activation follows the same pathway for  
104 both RNA and DNA viruses.

105 In this study, we investigated whether the DNA binding and cGAMP synthesis  
106 activities of human cGAS (hcGAS) are required for RNA virus restriction. While both  
107 activities were required, the amount of cGAMP produced during virus infection was  
108 too low to detect. We also confirmed that hcGAS binds mtDNA in both uninfected  
109 and infected cells but did not observe increased cytosolic or cGAS-associated  
110 mtDNA in response to RNA virus infection. We found that cGAS stimulated  
111 smoldering, low-level innate immune activation, most likely in response to  
112 endogenous DNA ligands, suggesting that cGAS-STING can passively restrict  
113 incoming RNA viruses.

## 114 **Results**

115 **cGAS mediates restriction of RNA viruses in immortalized MEFs.** To clarify  
116 the role of cGAS in restriction of RNA virus replication, we performed viral  
117 single-step growth curve experiments in wild-type (WT) and cGAS<sup>-/-</sup> (KO) MEFs  
118 immortalized with SV40 large T antigen (Figure 1). Both VSV-GFP and SINV-GFP  
119 grew to higher titers in KO MEFs (Figure 1A, B). We then asked whether  
120 reconstituting cGAS expression in KO MEFs could restore RNA virus restriction by  
121 performing VSV plaque assays on WT MEFs, KO MEFs, or KO MEFs stably  
122 expressing hcGAS-HA3x, a functional, triple HA-tagged form of human cGAS (34).  
123 As seen in Figure 1C, both WT and hcGAS-reconstituted (KO+WT) cells significantly  
124 reduced VSV-GFP plaque formation compared to KO MEFs. These results confirm  
125 previous observations that cGAS can restrict RNA virus infection.

126 **The cGAS DNA binding- and cGAMP synthase active site residues are**  
127 **essential for RNA virus restriction.** It is currently unclear whether cGAS restricts  
128 RNA viruses via the same mechanism that it restricts DNA viruses. We therefore  
129 asked whether the DNA binding and cGAMP synthase activities, which are required  
130 for DNA sensing and downstream STING activation, are also required for  
131 cGAS-mediated restriction of RNA viruses. Specifically, we reconstructed previously  
132 described loss-of-function mutations in the DNA binding pocket and cGAMP  
133 synthase active site within hcGAS-HA3x (27) (Figures 2A and S1), then restored  
134 cGAS expression in KO MEFs, as above. Notably, expression levels of  
135 hcGAS-HA3x were similar to endogenous mouse cGAS (Figure 2B). As expected,  
136 WT hcGAS-HA3x expression reduced VSV-GFP production, while expression of the  
137 DNA binding and catalytically inactive hcGAS-HA3x mutants did not (Figure 2B).  
138 These results indicate that cGAS-mediated restriction of an RNA virus depends on  
139 its DNA binding and cGAMP synthase activities.

140 Because SV40 T antigen and other viral oncogenes can inhibit innate immune  
141 responses, including cGAS-STING activation (37), we sought to confirm the above  
142 findings in untransformed cells. We therefore reconstituted primary cGAS<sup>-/-</sup> MEFs

143 with WT or mutant forms of hcGAS-HA3x and then assessed their ability to restrict  
144 the growth of VSV-GFP, SINV-GFP, or VSV $\Delta$ M51A-GFP, a VSV mutant (M51A in  
145 the M gene) that is more susceptible to innate immune responses (38). All three  
146 viruses were significantly restricted in primary MEFs reconstituted with WT  
147 hcGAS-HA3x but not with the DNA-binding nor cGAMP-synthase active site mutants  
148 (Figure 3A-C). Restriction of VSV $\Delta$ M51A-GFP was more potent than VSV-GFP.  
149 SINV-GFP was potently restricted by hcGAS WT but not by either DNA binding  
150 mutant; SINV-GFP infection was modestly reduced in cells expressing the  
151 E225A/D227A mutant.

152 To further corroborate the role of cGAS in restriction of RNA viruses in  
153 immunocompetent human cells, we utilized the THP-1 human monocyte line that  
154 has robust DNA sensing capability (21). First, we used CRISPR/Cas9 to generate  
155 cGAS KO THP-1 monocytes, then established stable lines reconstituted with WT or  
156 mutant hcGAS-HA3x; it should be noted that hcGAS-HA3x was overexpressed 2- to  
157 6-fold in THP-1 cells relative to endogenous hcGAS (Figure S2). Differentiated WT  
158 THP-1 cells and THP-1 KO cells reconstituted with WT hcGAS-HA3x restricted  
159 growth of VSV-GFP, VSV $\Delta$ M51A-GFP, and SINV-GFP, while THP-1 KO cells or  
160 THP-1 KO cells reconstituted with inactive hcGAS-HA3x mutants showed little or no  
161 restriction (Figure 3D–3F). As observed previously in MEFs, VSV $\Delta$ M51A-GFP was  
162 more potently restricted than VSV-GFP, but unlike in MEFs, infected fewer cells  
163 expressing mutant cGAS. This was also true for SINV-GFP, albeit restriction with  
164 WT hcGAS-HA3x was extremely potent, comparatively. It is unclear whether these  
165 modest decreases in infection of the cGAS mutants was due to hcGAS-HA3x  
166 overexpression in THP-1 cells, residual hcGAS activities, or normal clonal  
167 variation of cells. Nevertheless, these results are most consistent with an integral  
168 role for cGAS DNA binding and cGAMP synthase activities in RNA virus restriction.

169 **Detection of cGAMP produced in response to DNA transfection but not**  
170 **RNA virus infection.** Because cGAMP synthesis activity was essential for RNA  
171 virus restriction, we next sought to identify cGAMP produced in response to RNA



172 virus infection or, as a positive control, DNA transfection, by using liquid  
173 chromatography-mass spectrophotometry (LC-MS) and LC-MS/MS. HEK 293E cells  
174 were used in these experiments because this cell line lacks endogenous cGAS  
175 expression and could be reconstituted with WT or mutant hcGAS-HA3x; however,  
176 unlike MEFs and THP-1 KO cells, HEK 293E cells could be efficiently transfected  
177 with DNA and readily scaled up for isolation of cGAMP from cytosolic extracts. As  
178 shown in Figure 4A, a unique UHPLC peak (~5 minutes elution) was observed after  
179 transfecting WT hcGAS-HA3x-expressing HEK 293E cells with salmon sperm DNA;  
180 MS analysis confirmed that this peak corresponded to cGAMP (Figures 4B and 4C).  
181 Moreover, cGAMP was not observed in untransfected cells expressing WT cGAS or  
182 in DNA-transfected cells expressing a catalytically inactive form of hcGAS (Figure  
183 4D). Surprisingly, cGAMP remained below detectable levels after 5 hours of  
184 VSV-GFP infection at a MOI of 10 (Figure 4D), suggesting that detectable levels of  
185 cGAMP were not produced in response to RNA virus infection.

186 While the LC/MS technique provides exquisite specificity for identifying cGAMP  
187 in complex cytosolic extracts, cGAMP biological assays may be more sensitive.  
188 Indeed, our UPLC-MS configuration reliably detected nanogram amounts of cGAMP  
189 spiked into cytosolic extract (Fig. 4E), which equates to >1 million molecules of  
190 cGAMP per cell. We therefore established a bioassay for cGAMP-mediated IRF-3  
191 activation in streptolysin O- (SLO)-permeabilized cells (Figure 4F). This bioassay  
192 was shown to be dependent on STING activation (Fig. 4G) and had a limit of  
193 detection (L.O.D.) of  $\sim 5 \times 10^{-4} \mu\text{g}/\mu\text{l}$  ( $\sim 0.74 \mu\text{M}$ ) cGAMP (Figure 4H), in line with other  
194 published cGAMP bioassays (21). Again, we were unable to detect cGAMP in  
195 lysates from VSV-infected or SINV-infected THP-1 cells expressing WT hcGAS,  
196 while a synthetic cGAMP control led to robust phosphorylation of IRF3 (Figure 4I).  
197 To validate that cell-derived cGAMP could be detected by this assay, a time-course  
198 experiment was conducted by transfecting HEK 293E cells expressing WT hcGAS  
199 with salmon sperm DNA, revealing the time-dependent increase in cGAMP (Figure  
200 4J). Furthermore, we found that transfected cGAMP was rapidly turned over within



201 hours (Fig. 4K), most likely via the ENPP1 phosphodiesterase previously reported to  
202 turnover cGAMP in mammalian cells (39). Collectively, these results indicate that if  
203 cGAMP is produced in response to RNA virus infection, it may be produced at levels  
204 below the limit of our detection and/or rapidly turned over.

205 **cGAS binds mitochondrial DNA at steady state and during RNA virus**  
206 **infection.** Given that cGAS DNA binding activity was also required for RNA virus  
207 restriction, we sought to identify DNA ligands of cGAS during RNA virus infection.  
208 First, we identified conditions to specifically co-immunoprecipitate cGAS and  
209 mtDNA, a known DNA ligand (34). As shown in Figure 5A, mtDNA was specifically  
210 enriched by HA-immunoprecipitation from cells expressing WT hcGAS-HA3x, but  
211 not from cells expressing the K384E DNA binding mutant. It should be noted that this  
212 experiment is representative of many iterations performed at different scales. Given  
213 prior links between virus infection, mitochondrial stress, and cGAS-mtDNA  
214 interaction (34, 40), we next asked whether VSV altered the amount of  
215 cGAS-associated mtDNA. Surprisingly, VSV-GFP infection had no impact on the  
216 amount of cGAS-associated mtDNA (Fig. 5B), which led us to isolate cytosolic DNA  
217 (Figure 5C) to quantitate mtDNA content with and without infection. Unexpectedly,  
218 VSV-GFP infection had no impact on either the total amount of cellular mtDNA (Fig.  
219 5D) or cytosolic mtDNA (Fig. 5E).

220 To more broadly assess cytosolic and hcGAS-bound DNAs, we developed deep  
221 sequencing libraries from cytosolic extracts or after immunoprecipitation of WT  
222 hcGAS-HA3x. The first one-third of the mitochondrial genome was specifically  
223 enriched in cytosolic preps from both uninfected and VSV-GFP-infected MEFs  
224 (Figure 5F). Similarly, mtDNA was also highly enriched after immunoprecipitation of  
225 hcGAS-HA3x, although there was a bias for the latter three-quarters of the genome  
226 (Figure 5G). Importantly, there was no obvious difference in mtDNA pulldown  
227 between uninfected and infected cells. Collectively, these data indicate that VSV  
228 does not induce cytosolic release of mtDNA to stimulate cGAS activation. Consistent  
229 with this, VSV-GFP replicated equally well in LMTK cells and mtDNA-depleted LMTK

230  $\rho^0$  cells (41), which express cGAS and STING (Figure 5H). Collectively, these data  
231 suggest that mtDNA is dispensable for cGAS-mediated restriction of an RNA virus.

232 Although VSV is a negative-strand RNA virus that replicates solely via RNA  
233 intermediates, it has been reported that VSV-specific cDNAs can arise in infected  
234 cells, presumably through reverse transcriptase (RT) activity encoded by  
235 endogenous retroelement(s) (42). We therefore investigated whether such viral  
236 cDNAs arose during VSV-GFP infections in our laboratory. Indeed, VSV N  
237 gene-specific cDNAs were generated in infected cells, although in extremely low  
238 abundance,  $\sim 1$  copy/ $10^4$  cells (Figure 5I). The cDNA origin of the N gene template  
239 was confirmed by nuclease treatment (Figure 5J), by its sensitivity to tenofovir, an  
240 RT inhibitor that had no effect on VSV replication (Figure S3A), and by its enhanced  
241 expression in cells devoid of TREX1 nuclease (Figure S3B). We also identified  
242 virus-specific cDNAs in cells infected with yellow fever virus (YFV), a positive-strand  
243 RNA virus (Figure S3C), suggesting that cDNA formation is a general feature of RNA  
244 virus infections. Finally, to determine whether cDNA formation was specific to  
245 virus-infected cells or to viral transcripts, we examined whether cDNA forms of an  
246 abundant housekeeping gene, GAPDH, arose in uninfected cells. Indeed,  
247 splice-dependent GAPDH cDNAs were identified in low abundance by qPCR (Figure  
248 5K). Importantly, VSV or retroelement cDNAs were not detected in deep sequencing  
249 analyses of whole cytosol or cGAS-HA immunoprecipitations, likely due to their low  
250 abundance.

251 Collectively, our results indicate that cGAS binds mtDNA in both infected and  
252 uninfected cells, and that VSV infection does not induce the release of mtDNA into  
253 the cytosol or increase cGAS-bound mtDNA. Additionally, viral and cellular  
254 mRNA-specific cDNAs can be detected, but are of extremely low abundance, less  
255 than one copy per  $10^4$  cells. Taken together, these results suggest that steady state  
256 levels of cytosolic DNA, rather than virus-induced DNAs, may provide ligands for  
257 cGAS-mediated restriction of RNA virus replication.

258 **cGAS primes smoldering baseline ISG expression.** Based on the above  
259 results, we hypothesized that cGAS may serve to program baseline levels of innate  
260 immune activation rather than strictly in response to RNA virus infection. To address  
261 this, we analyzed ISRE-driven luciferase expression in uninfected THP-1 cells  
262 devoid of cGAS expression or reconstituted with WT or mutant hcGAS-HA3x (Figure  
263 6A). These experiments suggested that WT hcGAS-HA3x significantly enhances  
264 baseline ISG induction compared to the parental cGAS KO line and hcGAS mutants.  
265 Further experiments showed that WT hcGAS-HA3x also stimulated greater  
266 ISRE-driven luciferase production during infection of THP-1 cells with VSV-GFP and  
267 SINV-GFP (Figures 6B, C). It should be noted that VSV-GFP ISG levels were not  
268 appreciably different from the control, likely due to the transcriptional repression  
269 capability of the M protein (43, 44).

270 To confirm our ISRE-luciferase findings, we used RT-qPCR to quantify ISG  
271 transcripts known to be induced by the cGAS-STING DNA sensing pathway (Figures  
272 6D–6G). These results show that cGAS KO significantly reduced basal expression of  
273 Mx1 and CXCL10 in uninfected cells, but not of IFIT1, which was not expressed  
274 basally. Importantly, cells reconstituted with WT hcGAS-HA3x expressed  
275 significantly higher levels of IFIT1 and CXCL10 mRNA, while cells expressing  
276 inactive hcGAS-3xHA mutants did not. As these experiments were conducted in  
277 cells that slightly overexpressed hcGAS (Figure S2), ISG upregulation likely reflects  
278 reinforced, native patterns of expression.

279 To examine whether cGAS drives basal levels of innate immune activation *in*  
280 *vivo*, we examined ISG expression in vaginal tissue from uninfected WT B6J mice or  
281 in mice defective for several innate immunity pathways. As shown in Fig. 7, low basal  
282 levels of USP18, Mx1, and Rsad2 expression were observed in B6J mice, but were  
283 significantly decreased in IFNAR1<sup>-/-</sup> mice, demonstrating that basal ISG expression  
284 depends on IFNAR signaling. Importantly, cGAS<sup>-/-</sup> mice had significant decreases in  
285 basal Mx1 and Rsad2 expression, similar in degree to reduced basal USP18 and

286 Rsd2 expression observed in IRF3/7<sup>-/-</sup> mice. In contrast, MAVS had little effect on  
287 basal ISG expression.

288 Altogether, these results suggest that cGAS primes cells to express smoldering  
289 levels of ISG expression and that the DNA binding and catalytic activity are integral  
290 to this phenomenon.

291

## 292 **Discussion**

293 While the RLR-MAVS and cGAS-STING pathways are important, respectively,  
294 for restricting RNA and DNA virus infections, there is considerable crosstalk and  
295 redundancy between these two pathways. For instance, mammalian RNA  
296 polymerase III can transcribe A-T-rich DNA in the cytosol, producing uncapped  
297 RNAs that trigger RIG-I (45, 46). In addition, STING can physically associate with  
298 RIG-I and MAVS and may act as a cofactor in RNA sensing (47-49). More recently,  
299 STING has been shown to inhibit RNA virus replication, independent of ISG  
300 expression, via translational control (20).

301 Although cGAS was previously reported to restrict RNA viruses (50), it has been  
302 widely assumed — though unproven — that this restriction depends on cGAS's DNA  
303 binding and cGAMP synthase activities. Here, we used genetic knockout and  
304 transgenic replacement to determine that both DNA binding and cGAMP synthase  
305 activities are essential for cGAS-mediated restriction of RNA viruses. One caveat to  
306 this approach is that gene knockout can have far-reaching network-level effects on  
307 transcription, which are just beginning to be unearthed (51). A second caveat is that  
308 reconstituted cGAS was slightly overexpressed in THP-1 cells, which, at least for WT  
309 cGAS, can induce ISG expression (50, 52) and may have exaggerated the  
310 response. Nevertheless, our results in THP-1 cells were consistent with results  
311 obtained from MEFs (Figure 3), which did not overexpress cGAS. Taken together,  
312 these data establish that DNA binding and cGAMP synthase activities are required  
313 for cGAS-mediated RNA virus restriction.

314 Despite the essential role of cGAMP synthase activity and demonstrated  
315 detection of cGAMP synthesized after DNA transfection, we were unable to detect  
316 cGAMP production in response to VSV-GFP infection. Our results are consistent  
317 with results recently reported by Franz et al., who were also unsuccessful in  
318 detecting cGAMP production in VSV-infected cells (20). While Franz and colleagues  
319 concluded that cGAMP is not produced in response to VSV infection, we also  
320 considered the possibility that cGAMP levels may be below the limit of detection  
321 and/or rapidly degraded. Whereas cGAMP synthesis is readily detected in response  
322 to DNA transfection, this may simply reflect the wide dynamic range of cGAS in  
323 response to overloading the cytosol with transfected DNA. Moreover, it has been  
324 exceedingly difficult to detect cGAMP after virus infections, even for DNA viruses.  
325 For instance, Paijo et al. reported that the detection of cGAMP produced in response  
326 to cytomegalovirus infection was cell type-dependent, despite active cGAS-STING  
327 expression. Where cGAMP was detected, levels were on the order of  $5 \text{ fmol}/10^4$   
328 cells, or  $\sim 3 \times 10^5$  molecules/cell, which was slightly above their assay's limit of  
329 detection (53). As our biochemical and biological assays were both less sensitive  
330 than that of Paijo et al., we surmise that the synthesis of cGAMP in response to RNA  
331 virus infection is below the limit of detection and/or may be rapidly turned over.  
332 Alternatively, continuous low-level production of cGAMP in response to endogenous  
333 DNA ligands may be more relevant to RNA virus restriction. Clearly, cGAMP assays  
334 with improved sensitivity are needed to discern between these possibilities.

335 Because cGAS DNA binding activity was required for VSV restriction, we  
336 examined whether VSV introduces cGAS DNA ligands into the cytosol. Prior work  
337 has shown that the cytosolic release of mtDNA activates the cGAS-STING pathway  
338 (33-35); moreover, infection with HSV-1, a DNA virus, or dengue virus, an RNA  
339 virus, reportedly causes cytosolic release of mtDNA (34, 40). An emerging concept  
340 is that mammalian cells may regulate the efflux of mtDNA into the cytosol in  
341 response to stress, supported by a role for the Bax/Bak pore in mtDNA release as  
342 well as mitochondrial inner membrane release mechanisms via permeabilization and

343 herniation (33-35, 54, 55). In contrast, the levels of cytosolic mtDNA and  
344 cGAS-associated mtDNA did not increase during VSV infection. Moreover,  
345 cGAS-STING-mediated VSV restriction was intact in  $\rho^0$  cells, which lack mtDNA,  
346 consistent with similar experiments reported by Franz et al. (20). Real-time  
347 examination of mitochondrial dynamics may be needed to clarify the role of mtDNA  
348 release during RNA virus infections.

349         Given that cGAS recognizes RNA:DNA hybrids(22), as well as a recent report of  
350 VSV cDNAs (42), we also quantitated viral cDNAs produced during VSV infection.  
351 We confirmed that rare viral and cellular cDNAs are indeed produced, most likely by  
352 an endogenous cellular RT; however, the abundance of any given cDNA was  
353 incredibly low,  $\sim 1$  copy per  $10^4$  cells. This was less than the amount of VSV N-gene  
354 cDNA previous reported by Shimizu, et al. (42), which we attribute to the enhanced  
355 specificity of our hydrolysis probe-based assay vs. SYBR green assays.  
356 Nevertheless, the low abundance of VSV cDNAs is inconsistent with a model  
357 whereby RNA virus cDNAs play a significant role in stimulating population-wide  
358 innate immune responses. These findings, however, do highlight the constant  
359 synthesis and turnover of cDNAs within the mammalian cytosol. Consistent with this,  
360 deficiencies in the TREX1 nuclease lead to cytosolic accumulation of DNA, including  
361 retroelement cDNAs, causing chronic cGAS stimulation and autoimmunity in the  
362 form of Aicardi-Goutières syndrome (4, 56, 57).

363         Given that cGAS may be continuously stimulated by endogenous DNA ligands,  
364 and that candidate DNA ligands were unchanged during VSV infection, we  
365 examined whether cGAS contributes to a pre-existing baseline of innate immune  
366 activation. Indeed, low level cGAS-dependent ISG expression was observed even in  
367 the absence of viral infection and was significantly decreased in cGAS KO cells,  
368 consistent with prior examples of the cGAS-STING pathway altering ISG baseline  
369 expression (2, 50, 58, 59). These results support the hypothesis that cGAS  
370 contributes to RNA virus restriction by establishing smoldering, baseline-levels of  
371 constitutive innate immune activation. This is an important distinction from other

372 models where cGAS responds to RNA virus-induced release of mtDNA. Additional  
373 work will be needed to definitively identify the relevant DNA ligands that activate  
374 cGAS; we suggest that pre-existing baseline stimuli should be considered.

375 While ISG expression served as a convenient and sensitive readout of baseline  
376 cGAS-STING activation in our studies, it should be noted that we did not  
377 demonstrate that low-level ISG expression directly contributes to RNA virus  
378 restriction. On the surface, our results may seem at odds with those of Franz et al.,  
379 who recently reported that STING restricts RNA viruses, including VSV, in an  
380 ISG-independent manner (20). However, we do not exclude the possibility that  
381 smoldering cGAS activation may also contribute to ISG-independent mechanisms of  
382 virus restriction via STING.

383 In summary, we propose that cGAS may become activated in response to RNA  
384 virus infection, such as by virus-induced mtDNA release, but also contributes to RNA  
385 virus restriction via constitutive, low-level innate immune activation, likely via  
386 recognition of endogenous DNA ligands (Fig. 8).



## 387 **Materials and Methods**

388 **Animal research.** All mice were maintained, bred, and handled in our facility in  
389 compliance with federal and institutional policies under protocols approved by the  
390 Yale Animal Care and Use Committee. C57BL/6J, B6(C)-Cgas<sup>tm1d(EUCOMM)Hmgu/J</sup>  
391 (cGAS<sup>-/-</sup>) mice (50) and B6(Cg)-Ifnar1tm1.2Ees/J (*Ifnar1*<sup>-/-</sup>) mice (60) were  
392 purchased from Jackson Laboratory. *Irf3*<sup>-/-</sup> *Irf7*<sup>-/-</sup> mice (61) were a generous gift by  
393 Dr. T. Taniguchi (University of Tokyo) and *Mavs*<sup>-/-</sup> mice (62) were a generous gift by  
394 Dr. Z. Chen (University of Texas, Southwestern).

395 Primary MEFs were isolated from day 14.5 embryos (E14.5) as previously  
396 described (63). Vaginal tissue was harvested from six- to twelve-week old female  
397 mice synchronized in diestrus via subcutaneous injection with 2 mg Depo-Provera in  
398 the neck scruff; mice were sacrificed and vaginal tissue harvested ten days after  
399 Depo-Provera treatment.

400 **Cell cultures.** All cells were maintained at low passage by using a seed-lot  
401 system and routinely tested for mycoplasma contamination. HEK 293E cells were  
402 obtained from Dr. W. Mothes (Yale); SW13 cells were obtained from Dr. C. Rice  
403 (Rockefeller University); BHK-21 cells were obtained from Dr. D. Brackney (State of  
404 Connecticut Agriculture Research Station); LMTK and LMTK  $\rho^0$  cells were obtained  
405 from Dr. G. Shadel (Yale). HEK293E, SW13, BHK-21 and MEF cells were  
406 maintained at 37°C and 5% CO<sub>2</sub> in complete growth medium (DMEM containing 2  
407 mM L-glutamine [Invitrogen], 10% heat-inactivated fetal calf serum [FCS, Omega  
408 Scientific], and 0.1 mM non-essential amino acids [NEAA; Invitrogen]). LMTK and  
409 LMTK  $\rho^0$  cells were maintained in DMEM as above supplemented with 100  $\mu$ g/mL  
410 sodium pyruvate (Invitrogen) and 50  $\mu$ g/mL uridine (Sigma)

411 THP-1-Lucia ISG cells (Invivogen) were maintained at 37°C and 5% CO<sub>2</sub> in  
412 RPMI 1640 containing 2 mM L-glutamine, 10% FCS, 0.1 mM NEAA, 10 U/mL  
413 penicillin/streptomycin, 100  $\mu$ g/mL normocin, and 100  $\mu$ g/mL zeocin.

414 Pilot experiments showed that THP-1-derived macrophages were more  
415 permissive for SINV-GFP than undifferentiated THP-1 monocytes. Differentiation of

416 THP-1 monocytes to macrophages was performed by plating cells at a concentration  
417 of  $5 \times 10^5$  cells/mL in fresh media and incubating for three days with 100 ng/mL  
418 phorbol myristate acetate (PMA; Invivogen). Adherent monolayers were washed  
419 once with DPBS, dissociated with 0.05% trypsin/EDTA, resuspended in fresh media,  
420 counted, and seeded for experimentation.

421 **Viruses.** Viruses expressing green fluorescent protein (GFP) were used to  
422 facilitate monitoring of virus infections. rVSV-p1-eGFP (VSV-GFP) (64) and  
423 rVSV- $\Delta$ M51-p5-eGFP (VSV $\Delta$ M51A-GFP) (65) were kind gifts from Drs. J. Rose and  
424 A. van den Pol (Yale), respectively. SINV G100-eGFP (SINV-GFP) (66) was a kind  
425 gift from Dr. M. Heise (University of North Carolina, Chapel Hill). VSV and SINV  
426 stocks were generated via low multiplicity of infection (MOI = 0.01) passage in  
427 BHK-21 cells. Herpes simplex virus 1 KOS-eGFP (HSV-GFP) (67), kindly provided  
428 by Dr. P. Desai (Johns Hopkins Medical School), was propagated by low MOI  
429 passage (MOI 0.01) in Vero cells, and harvested at 60 hours post-infection.  
430 HSV-GFP was prepped by three cycles of freezing ( $-80^\circ\text{C}$ ) and thawing ( $37^\circ\text{C}$ ),  
431 clarification ( $1,500 \times g$  for 15 minutes at  $4^\circ\text{C}$ ), addition of 10% FCS and 7% dimethyl  
432 sulfoxide, aliquoted, and stored at  $-80^\circ\text{C}$ .

433 **Plaque assay and fluorescent cell counting.** Plaque assays were developed  
434 by using semi-solid overlays (DMEM, 10% FCS, 1.6% LE agarose). When plaque  
435 formation was evident, cells were fixed with 3% formaldehyde, agarose plugs were  
436 removed, and cells stained with 0.1% crystal violet in 20% ethanol. Plaque forming  
437 units per mL (pfu/mL) were calculated by counting the number of colonies formed  
438 and multiplying this count by the dilution factor.

439 To prepare GFP-expressing cells for cytometry, cells were trypsinized, washed  
440 with DPBS, and fixed in DPBS containing 1% PFA. Fluorescent cells were counted  
441 on an Accuri C6 Flow Cytometer (Becton-Dickinson).

442 **Protein analysis.** For western blotting, cells were lysed in RIPA buffer (50 mM  
443 Tris pH 8.0, 150 mM NaCl, 1% Triton X-100, 0.5% sodium deoxycholate, 0.1% SDS)  
444 containing protease inhibitor cocktail, followed by a 20-minute spin at  $16,100 \times g$  and

445 4°C to remove insoluble material. Protein concentrations were quantified by using a  
446 BCA protein assay kit (Thermo Scientific). Equal amounts of protein were separated  
447 on 4-12% Bis-Tris Bolt SDS-PAGE gels (Thermo Scientific) and transferred to PVDF  
448 membranes by using a Pierce Fast Semi-Dry Blotter. Immunoblotting was performed  
449 by 30 minutes of blocking with either 5% milk (American Bio) or SuperBlock (Thermo  
450 Scientific) followed by primary antibody and then secondary antibody (2 hours and 1  
451 hour at room temperature, respectively), diluted in the same blocking solution. Blots  
452 were developed by using SuperSignal Pico or Femto chemiluminescence substrate  
453 kits (Thermo Scientific) and imaged on a GE ImageQuant LAS 4000. Precision Plus  
454 protein standards (Bio-Rad) were used to estimate protein molecular weights.

455 The following primary antibodies were used for western blotting analysis: Rabbit  
456 anti-HA (1:1,000, Abcam #ab9110), rabbit anti-pIRF3 (1:1,000, Abcam #76493),  
457 rabbit anti-cGAS (1:500, CST #15102s), rabbit anti-TOM40 (1:5,000, Santa Cruz  
458 #H-300), rabbit anti-Calreticulin (1:5,000, Abcam #ab2907), rabbit anti-Lamin B1  
459 (1:1,000, Abcam #ab16048), and mouse anti- $\beta$ -actin (1:10,000, Sigma #A1978).  
460 The following secondary antibodies were used for western blotting analysis: Goat  
461 anti-rabbit horseradish peroxidase (1:5,000, Jackson ImmunoResearch  
462 #111-035-144), and goat anti-mouse horseradish peroxidase (1:5,000, Jackson  
463 #115-035-146).

464 To immunoprecipitate cGAS-DNA complexes, hcGAS-HA3x-expressing cells  
465 were fixed in DPBS containing 0.5% paraformaldehyde (5 minutes, room  
466 temperature), then quenched with 125 mM glycine. All subsequent steps were  
467 performed at 4°C. After two washes with DPBS, cells were lysed for 30 minutes in  
468 ice-cold RIPA, followed by a 20-minute spin at 16,100 x g. Clarified lysates were  
469 sonicated with four cycles of 10 seconds on and 30 seconds off at 20% amplitude on  
470 a Sonifier 450 (Branson Ultrasonics). Samples were spun for 20 minutes at 16,100 x  
471 g and supernatants were retained.

472 To perform immunoprecipitation, lysates were pre-cleared with 2  $\mu$ g/mL rabbit  
473 sera and two incubations with 50  $\mu$ L protein A-magnetic beads (Pierce). Samples

474 were then rotated overnight with 2 µg HA antibody, and complexes were captured  
475 with Protein A-magnetic beads. Washing was performed as follows: 2x with RIPA, 2x  
476 with high salt RIPA (500 mM NaCl), 1x with IP-wash buffer (0.5 M LiCl, 1% NP-40,  
477 1% deoxycholate, 100 mM Tris-HCl pH 8.0), and 2x with T<sub>10</sub>E<sub>1</sub> (10 mM Tris-HCl pH  
478 8.0, 1 mM EDTA). Bound complexes were eluted with 0.1 M glycine-HCl, pH 2.5,  
479 samples were neutralized with 1 M Tris-HCl pH 8.0 (0.1 M final), and eluted  
480 protein-nucleic acid complexes were then processed for western blotting or deep  
481 sequencing (see Nucleic acid purification, below).

482 **PCR, qPCR, and RT-PCR.** Standard PCRs were performed with Phusion DNA  
483 polymerase or Taq DNA polymerase (NEB). Unless otherwise noted, cycling was  
484 performed for 35 cycles with primers listed in Table 1.

485 For RT-PCR, RNAs were extracted from cells by using TRIzol Reagent (Life  
486 Technologies) or the RNeasy extraction kit (Qiagen). Viral RNA was extracted from  
487 cell culture media with the QiAmp Viral RNA Mini Kit (Qiagen). cDNA synthesis was  
488 performed by using random hexamer or gene-specific primers with the Transcriptor  
489 First Strand cDNA Synthesis Kit (Roche).

490 For qPCR of cell culture-derived cDNAs, primers were designed by using the  
491 ProbeFinder software (Roche) for compatibility with Roche Universal Probe Library  
492 (UPL) hydrolysis probes. Assays were performed in a LightCycler 96 or LightCycler  
493 480 (Roche), as per manufacturer's instructions, with primers and UPL probes listed  
494 in Table 1. All reactions were performed in duplicate and quantified by comparison to  
495 standard curves created with cloned amplicons diluted ( $10^2 - 10^7$  copies) in ddH<sub>2</sub>O  
496 supplemented with 50 ng/µL carrier DNA and run in parallel.

497 For RT-qPCR of mouse tissue-derived mRNAs, SYBR Green qPCR reactions  
498 were run in triplicate with gene specific primers (Table 1). The Ct values were  
499 averaged, internally normalized against housekeeping gene HPRT, then normalized  
500 to B6J control mice by using the  $\Delta\Delta C_t$  method of comparison. Fold-expression was  
501 estimated assuming one doubling per cycle (fold expression =  $2^{-\Delta\Delta C_t}$ ).

502 **Plasmids, lentiviruses, and retroviruses.** pMXs-hcGAS-HA3x-IRES-puro  
503 was made by PCR amplifying hcGAS-HA3x from pUNO1-hcGAS-HA3x (Invivogen)  
504 with YO-2142 and YO-2143 and cloning into pMXs-mcGAS-HA3x-IRES-puro (gift of  
505 Dr. G. Shadel, Yale University) via common XhoI and NotI sites. To facilitate  
506 reconstitution of puromycin-resistant cGAS knockout (KO) cells with hcGAS, the Pac  
507 gene in pMXs-hcGAS-HA3x-IRES-puro was replaced with the Bsd gene, amplified  
508 from pMICU-APEX2 (68) (Addgene plasmid # 79057). In addition, the 518-bp NotI–  
509 BlnI fragment of hcGAS was recoded (BlueHeron) to avoid editing of the  
510 reconstituted hcGAS. For transient expression of hcGAS in primary MEFs,  
511 hcGAS-3xHA was cloned into pLenti-puro (69) (Addgene plasmid # 39481).

512 Site-directed mutagenesis of hcGAS was performed by using appropriate  
513 primers (Table 1) and PfuTurbo (Agilent Technologies), as previously described  
514 (70). Mutants were sequenced and subcloned back into the pMXs-IRES-puro vector  
515 with XhoI and NotI.

516 Gene knockout was performed in cell culture by using Cas9 to induce  
517 non-homologous end-joining repair. Briefly, gRNAs-specific oligos (Table 1) were  
518 chosen from published datasets (71) or designed with gRNA Designer (72) and  
519 cloned into pLentiCRISPR (73) (Addgene plasmid # 51760).

520 **Lentiviruses and retroviruses.** Lentiviruses and retroviruses were packaged in  
521 HEK 293E cells by co-transfection with appropriate HIV- or MLV-Gag/Pol and VSV G  
522 packaging constructs. Forty-eight hours post-transfection, packaged vector stocks  
523 were clarified (16,100 x g), passed through a 0.45 µm filter, and supplemented with 8  
524 µg/mL polybrene (Sigma) and 20 mM HEPES (Life Technologies). Target cells were  
525 transduced by spinoculation, selected with 3 µg/mL puromycin, and screened for  
526 expression or knockout via genomic PCR and sequencing and/or western blotting.  
527 To develop clonal cultures, adherent cells were isolated by using sterile 8 mm Pyrex  
528 cloning cylinders and expanded. Clonal phenotypes were screened via western  
529 blotting or qPCR.

530 **Luciferase assays.** Lucia luciferase-containing samples were clarified by  
531 centrifugation (16,100 × g for 5 minutes) and mixed with ¼-volume of 5x Renilla lysis  
532 buffer (Promega) to destroy virus infectivity. Lucia activity in 20 µL samples was  
533 measured on a Centro LB 960 plate reader (Berthold) by integrating over 10  
534 seconds.

535 **cGAMP extraction and assays.** Cells were infected for five hours with  
536 VSV-GFP or SINV-GFP (MOI 3–10), transfected for five hours with salmon sperm  
537 DNA (2 µg/mL final concentration) and Transit LT-1 (Mirus), or left untreated.  
538 cGAMP was extracted based on established methods (21). Briefly, cells were  
539 dissociated with trypsin, washed with DPBS, gently pelleted and resuspended at a  
540 concentration of  $1 \times 10^7$  cells/mL in ice-cold cGAMP homogenization buffer (10 mM  
541 Tris-HCl, pH 7.4, 10 mM KCl, 1.5 mM MgCl<sub>2</sub>). Cells were lysed via nitrogen  
542 cavitation in a cell disruptor (Parr Instrument Company). Lysates were clarified at  
543 1,000 × g for 5 minutes, then 16,100 × g for 10 minutes, retaining the supernatants.  
544 Resulting supernatants were digested for 1 hour with benzonase (0.5 U/µL; Fisher  
545 Scientific) at 37°C, 1 hour with proteinase K (0.5 U/µL; Invitrogen) at 55°C,  
546 heat-inactivated at 95°C for 10 min, and spun for 5 minutes at 16,100 × g, retaining  
547 the final supernatant (S1).

548 To detect cGAMP bioactivity, 2 µL of S1 sample, synthetic cGAMP (positive  
549 controls), or DPBS (negative controls) were incubated with  $10^6$  THP-1 cells, 2 mM  
550 ATP, 1.5 ng/µL SLO (a kind gift from Dr. N. Andrews, University of Maryland) and  
551 media in 8 µL (total volume). After 1.5 hours at 30°C, reactions were lysed with an  
552 equal volume of RIPA buffer and processed for phosphorylated IRF3 western blot,  
553 as above.

554 To detect cGAMP by liquid chromatography and mass spectrophotometry,  
555 trypsinized cells were washed once with DPBS, pelleted at 1,000 × g and then frozen  
556 at -20°C. To extract cGAMP,  $5 \times 10^6$  cells/mL were resuspended three times in  
557 extraction buffer (40% acetonitrile, 40% methanol, 20% ddH<sub>2</sub>O) for 20 minutes,  
558 spinning after each extraction at 16,100 × g and keeping the supernatant.



559 Supernatants were pooled, dried overnight in a GeneVac HT-8 (SP Scientific), and  
560 resuspended in 100  $\mu$ L ddH<sub>2</sub>O per  $5 \times 10^6$  cells. Samples were filtered with a 0.2  $\mu$ m  
561 PTFE syringe filter (VWR) prior to loading into a Luna Omega C18 UHPLC column  
562 (Phenomenex) on an iFunnel 6550 Q-TOF / MS (Agilent). Samples were run in  
563 negative mode with the following parameters: Buffer A = 0.1% formic acid; Buffer B =  
564 acetonitrile, 0.1% formic acid; gradient cycles: 0 – 4% B over 10 minutes, 4% B –  
565 100% B over 5 minutes, 5 minutes wash with 100% B; UV detection at 260 nm, m/z  
566 scans from 150-1,000. cGAMP was observed between 4–7.5 minutes in extracted  
567 ion chromatographs at an observed mass of 673.085 m/z; this was confirmed to be  
568 cGAMP by MS/MS ion fragmentation patterns.

569 **Preparation of cytosolic nucleic acid extracts.** Cells were trypsinized and  
570 resuspended in an equal volume of fresh media, then spun at 1,000 x g for 5 minutes  
571 at room temperature. After washing once with DPBS, cells were resuspended in  
572 cytosolic extraction buffer (50 mM HEPES pH 7.4, 150 mM NaCl, 25  $\mu$ g/mL digitonin)  
573 and incubated for 10 minutes at 4°C with rotation. A succession of 4°C spins was  
574 performed, retaining the supernatant for each step: 3x 1,000 x g for 3 minutes, 1x  
575 16,100 x g for 10 minutes, 1x 100,000 x g for 1 hour on a 0.34 M sucrose cushion  
576 (SW41 Ti rotor, Beckman). The final supernatant was then processed for western  
577 blotting, above, and DNA purification, below.

578 **DNA purification and phi29 amplification.** DNA was isolated from total cytosol  
579 by treating samples with RNase A and RNase T1 (Ambion) for 1 hour at 37°C,  
580 digesting with Proteinase K for 1 hour at 55°C, and heat inactivating at 95°C for 15  
581 minutes. DNAs were then purified with the QiaQuick purification kit (Qiagen). To  
582 isolate DNA from immunoprecipitates, crosslinks were reversed by adding 5 M NaCl  
583 (0.3 M final) and shaking overnight at 65°C, then digesting RNA and protein, as  
584 above. For isothermal DNA amplification, 1–40 ng of DNA was annealed to  
585 exo-resistant random hexamer primers (Molecular Cloning Laboratories) and  
586 amplified overnight at 30°C with phi29 DNA polymerase (NEB), followed by a 65°C  
587 inactivation step. DNA was extracted with the QiaQuick purification kit.



588       **Sequencing library preparation, sequencing, and analysis.** Phi29-amplified  
589 samples were sonicated, as above, to achieve DNA fragments of 200- to 500-bp.  
590 DNAs were end-repaired with T4 DNA polymerase (NEB), T4 polynucleotide kinase  
591 (NEB), and Klenow DNA polymerase (NEB) at 20°C for 30 minutes, then purified via  
592 QiaQuick. A-tailing was performed with Klenow fragment (3'-5' exo[-], NEB) before  
593 ligation of TruSeq Adapters (Illumina) and amplification with Phusion DNA  
594 Polymerase (NEB) and Illumina TruSeq primer cocktails. Size-selected libraries  
595 (350- to 450-bp) were excised from LMP agarose, purified with a Gel Extraction Kit  
596 (Qiagen), re-amplified by PCR for 18 cycles, then purified. Triplicate libraries were  
597 sequenced on a HiSeq4000 (Illumina) by the Yale Center for Genome Analysis with  
598 a 150-bp paired-end protocol, 100 million reads/sample.

599       **Software and Statistics.** Unless otherwise noted, statistical significance was  
600 estimated by using the Student's t-test with Holm-Sidak correction for multiple  
601 comparisons. Standard p-value indicators were used throughout the manuscript: \*  
602 indicates  $p < 0.05$ ; \*\* indicates  $p < 0.01$ ; \*\*\* indicates  $p < 0.001$ ; and \*\*\*\* indicates  
603  $p < 0.0001$ . Data were graphed by using Graphpad Prism software (version 7.0a).  
604 Pixel densities were analyzed in ImageJ2 (74) and images were prepared for  
605 presentation with Photoshop and Illustrator CS4 (Adobe). Next-generation  
606 sequencing results were mapped to the mm10 mouse genome by using the  
607 Burrows-Wheeler aligner (BWA) (75) and TopHat (76) to look for raw and gapped  
608 alignment, respectively. Alignments were assessed for content of genomic DNA and  
609 mtDNA with the integrated genome browser software (77).

610

611       **Acknowledgments.** We thank Drs. H. Ramanathan, D. DiMaio, and P. Cresswell for  
612 constructive feedback; Ms. H. Dong for technical help in isolating primary MEFs; Drs.  
613 G. Shadel for SV40 T-immortalized MEFs; Drs. D. Schatz, G. Teng, and S. Mehta for  
614 technical help in sequence library preparation and analysis; Drs. J. Rose and A. van  
615 den Pol for VSV-GFP; Dr. M. Heise for SINV-GFP; Dr. P. Desai for HSV-1; and Dr.  
616 N. Andrews for SLO. This research was funded by 5R01AI087925 (to BDL) and

617 1R01AI131518 (to BDL), the Yale Interdisciplinary Immunology Training Program  
618 (NIH T32AI07019, to Dr. D. Schatz (Yale) in support of MTP), the Yale Gruber  
619 Science Fellowship (to MTP), and the National Science Foundation Graduate  
620 Research Fellowship (DGE1122492, to MTP).  
621

622

## References

- 623 1. **Janeway CA, Jr.** 1989. Approaching the asymptote? Evolution and  
624 revolution in immunology. *Cold Spring Harb Symp Quant Biol* **54 Pt 1**:1-13.
- 625 2. **Ishikawa H, Barber GN.** 2008. STING is an endoplasmic reticulum adaptor  
626 that facilitates innate immune signalling. *Nature* **455**:674-678.
- 627 3. **Ishikawa H, Ma Z, Barber GN.** 2009. STING regulates intracellular  
628 DNA-mediated, type I interferon-dependent innate immunity. *Nature*  
629 **461**:788-792.
- 630 4. **Stetson DB, Ko JS, Heidmann T, Medzhitov R.** 2008. Trex1 prevents  
631 cell-intrinsic initiation of autoimmunity. *Cell* **134**:587-598.
- 632 5. **Hasan M, Koch J, Rakheja D, Pattnaik AK, Brugarolas J, Dozmorov I,**  
633 **Levine B, Wakeland EK, Lee-Kirsch MA, Yan N.** 2013. Trex1 regulates  
634 lysosomal biogenesis and interferon-independent activation of antiviral  
635 genes. *Nature Immunology* **14**:61-71.
- 636 6. **Yan N, Regalado-Magdos AD, Stiggelbout B, Lee-Kirsch MA, Lieberman**  
637 **J.** 2010. The cytosolic exonuclease TREX1 inhibits the innate immune  
638 response to human immunodeficiency virus type 1. *Nature Immunology*  
639 **11**:1005-1013.
- 640 7. **Aguirre S, Maestre AM, Pagni S, Patel JR, Savage T, Gutman D,**  
641 **Maringer K, Bernal-Rubio D, Shabman RS, Simon V, Rodriguez-Madoz**  
642 **JR, Mulder LCF, Barber GN, Fernandez-Sesma A.** 2012. DENV Inhibits  
643 Type I IFN Production in Infected Cells by Cleaving Human STING. *PLoS*  
644 *Pathogens* **8**:e1002934.
- 645 8. **Yu C-Y, Chang T-H, Liang J-J, Chiang R-L, Lee Y-L, Liao C-L, Lin Y-L.**  
646 2012. Dengue Virus Targets the Adaptor Protein MITA to Subvert Host Innate  
647 Immunity. *PLoS Pathogens* **8**:e1002780.
- 648 9. **Ding Q, Gaska JM, Douam F, Wei L, Kim D, Balev M, Heller B, Ploss A.**  
649 2018. Species-specific disruption of STING-dependent antiviral cellular  
650 defenses by the Zika virus NS2B3 protease. *Proc Natl Acad Sci U S A*  
651 **115**:E6310-E6318.

- 652 10. **Ding Q, Cao X, Lu J, Huang B, Liu Y-J, Kato N, Shu H-B, Zhong J.** 2013.  
653 Hepatitis C virus NS4B blocks the interaction of STING and TBK1 to evade  
654 host innate immunity. *Journal of Hepatology* **59**:52-58.
- 655 11. **Nitta S, Sakamoto N, Nakagawa M, Kakinuma S, Mishima K,**  
656 **Kusano-Kitazume A, Kiyohashi K, Murakawa M, Nishimura-Sakurai Y,**  
657 **Azuma S, Tasaka-Fujita M, Asahina Y, Yoneyama M, Fujita T, Watanabe**  
658 **M.** 2013. Hepatitis C virus NS4B protein targets STING and abrogates RIG-I–  
659 mediated type I interferon-dependent innate immunity. *Hepatology* **57**:46-58.
- 660 12. **Devaraj SG, Wang N, Chen Z, Chen Z, Tseng M, Barretto N, Lin R, Peters**  
661 **CJ, Tseng C-TK, Baker SC, Li K.** 2007. Regulation of IRF-3-Dependent  
662 Innate Immunity by the Papain-like Protease Domain of the SARS  
663 Coronavirus. *Journal of Biological Chemistry* **282**:32208-32221.
- 664 13. **Chen X, Yang X, Zheng Y, Yang Y, Xing Y, Chen Z.** 2014. SARS  
665 coronavirus papain-like protease inhibits the type I interferon signaling  
666 pathway through interaction with the STING-TRAF3-TBK1 complex. *Protein*  
667 *& Cell* **5**:369-381.
- 668 14. **Clementz MA, Chen Z, Banach BS, Wang Y, Sun L, Ratia K, Baez-Santos**  
669 **YM, Wang J, Takayama J, Ghosh AK, Li K, Mesecar AD, Baker SC.** 2010.  
670 Deubiquitinating and Interferon Antagonism Activities of Coronavirus  
671 Papain-Like Proteases. *Journal of Virology* **84**:4619-4629.
- 672 15. **Sun L, Xing Y, Chen X, Zheng Y, Yang Y, Nichols DB, Clementz MA,**  
673 **Banach BS, Li K, Baker SC, Chen Z.** 2012. Coronavirus Papain-like  
674 Proteases Negatively Regulate Antiviral Innate Immune Response through  
675 Disruption of STING-Mediated Signaling. *PLoS ONE* **7**:e30802.
- 676 16. **Xing Y, Chen J, Tu J, Zhang B, Chen X, Shi H, Baker SC, Feng L, Chen Z.**  
677 2013. The papain-like protease of porcine epidemic diarrhea virus negatively  
678 regulates type I interferon pathway by acting as a viral deubiquitinase. *The*  
679 *Journal of General Virology* **94**:1554-1567.

- 680 17. **Yang X, Chen X, Bian G, Tu J, Xing Y, Wang Y, Chen Z.** 2014. Proteolytic  
681 processing, deubiquitinase and interferon antagonist activities of Middle East  
682 respiratory syndrome coronavirus papain-like protease. *Journal of General*  
683 *Virology* **95**:614-626.
- 684 18. **Holm CK, Rahbek SH, Gad HH, Bak RO, Jakobsen MR, Jiang Z, Hansen**  
685 **AL, Jensen SK, Sun C, Thomsen MK, Laustsen A, Nielsen CG,**  
686 **Severinsen K, Xiong Y, Burdette DL, Hornung V, Lebbink RJ, Duch M,**  
687 **Fitzgerald KA, Bahrami S, Mikkelsen JG, Hartmann R, Paludan SR.**  
688 2016. Influenza A virus targets a cGAS-independent STING pathway that  
689 controls enveloped RNA viruses. *Nature Communications* **7**:10680.
- 690 19. **Liu S, Cai X, Wu J, Cong Q, Chen X, Li T, Du F, Ren J, Wu YT, Grishin**  
691 **NV, Chen ZJ.** 2015. Phosphorylation of innate immune adaptor proteins  
692 MAVS, STING, and TRIF induces IRF3 activation. *Science* **347**:aaa2630.
- 693 20. **Franz KM, Neidermyer WJ, Tan Y-J, Whelan SPJ, Kagan JC.** 2018.  
694 STING-dependent translation inhibition restricts RNA virus replication.  
695 *Proceedings of the National Academy of Sciences* **115**:E2058.
- 696 21. **Wu J, Sun L, Chen X, Du F, Shi H, Chen C, Chen ZJ.** 2013. Cyclic  
697 GMP-AMP is an endogenous second messenger in innate immune signaling  
698 by cytosolic DNA. *Science* **339**:826-830.
- 699 22. **Mankan AK, Schmidt T, Chauhan D, Goldeck M, Höning K, Gaidt M,**  
700 **Kubarenko AV, Andreeva L, Hopfner K-P, Hornung V.** 2014. Cytosolic  
701 RNA:DNA hybrids activate the cGAS–STING axis. *The EMBO Journal*  
702 **33**:2937-2946.
- 703 23. **Schoggins JW, MacDuff DA, Imanaka N, Gainey MD, Shrestha B, Eitson**  
704 **JL, Mar KB, Richardson RB, Ratushny AV, Litvak V, Dabelic R,**  
705 **Manicassamy B, Aitchison JD, Aderem A, Elliott RM, Garcia-Sastre A,**  
706 **Racaniello V, Snijder EJ, Yokoyama WM, Diamond MS, Virgin HW, Rice**  
707 **CM.** 2014. Pan-viral specificity of IFN-induced genes reveals new roles for  
708 cGAS in innate immunity. *Nature* **505**:691-695.

- 709 24. **Schoggins JW, Wilson SJ, Panis M, Murphy MY, Jones CT, Bieniasz P,**  
710 **Rice CM.** 2011. A diverse range of gene products are effectors of the type I  
711 interferon antiviral response. *Nature* **472**:481.
- 712 25. **Li X, Shu C, Yi G, Chaton Catherine T, Shelton Catherine L, Diao J, Zuo**  
713 **X, Kao CC, Herr Andrew B, Li P.** 2013. Cyclic GMP-AMP Synthase Is  
714 Activated by Double-Stranded DNA-Induced Oligomerization. *Immunity*  
715 **39**:1019-1031.
- 716 26. **Zhang X, Wu J, Du F, Xu H, Sun L, Chen Z, Brautigam Chad A, Zhang X,**  
717 **Chen Zhijian J.** 2014. The Cytosolic DNA Sensor cGAS Forms an  
718 Oligomeric Complex with DNA and Undergoes Switch-like Conformational  
719 Changes in the Activation Loop. *Cell Reports* **6**:421-430.
- 720 27. **Kranzusch Philip J, Lee Amy S-Y, Berger James M, Doudna Jennifer A.**  
721 2016. Structure of Human cGAS Reveals a Conserved Family of  
722 Second-Messenger Enzymes in Innate Immunity. *Cell Reports* **3**:1362-1368.
- 723 28. **Civril F, Deimling T, de Oliveira Mann CC, Ablasser A, Moldt M, Witte G,**  
724 **Hornung V, Hopfner K-P.** 2013. Structural mechanism of cytosolic DNA  
725 sensing by cGAS. *Nature* **498**:332.
- 726 29. **Ablasser A, Goldeck M, Cavlar T, Deimling T, Witte G, Röhl I, Hopfner**  
727 **K-P, Ludwig J, Hornung V.** 2013. cGAS produces a 2'-5'-linked cyclic  
728 dinucleotide second messenger that activates STING. *Nature* **498**:380-384.
- 729 30. **Zhang X, Shi H, Wu J, Zhang X, Sun L, Chen C, Chen ZJ.** 2013. Cyclic  
730 GMP-AMP Containing Mixed Phosphodiester Linkages Is An Endogenous  
731 High Affinity Ligand for STING. *Molecular cell*  
732 **51**:10.1016/j.molcel.2013.1005.1022.
- 733 31. **Gao P, Ascano M, Wu Y, Barchet W, Gaffney BL, Zillinger T, Serganov**  
734 **AA, Liu Y, Jones RA, Hartmann G, Tuschl T, Patel DJ.** 2013. Cyclic  
735 [G(2',5')pA(3',5')p] Is the Metazoan Second Messenger Produced by  
736 DNA-Activated Cyclic GMP-AMP Synthase. *Cell* **153**:1094-1107.

- 737 32. **Diner EJ, Burdette DL, Wilson SC, Monroe KM, Kellenberger CA, Hyodo**  
738 **M, Hayakawa Y, Hammond MC, Vance RE.** 2013. The innate immune DNA  
739 sensor cGAS produces a non-canonical cyclic-di-nucleotide that activates  
740 human STING. *Cell reports* **3**:1355-1361.
- 741 33. **White Michael J, McArthur K, Metcalf D, Lane Rachael M, Cambier**  
742 **John C, Herold Marco J, van Delft Mark F, Bedoui S, Lessene G, Ritchie**  
743 **Matthew E, Huang David CS, Kile Benjamin T.** 2014. Apoptotic Caspases  
744 Suppress mtDNA-Induced STING-Mediated Type I IFN Production. *Cell*  
745 **159**:1549-1562.
- 746 34. **West AP, Khoury-Hanold W, Staron M, Tal MC, Pineda CM, Lang SM,**  
747 **Bestwick M, Duguay BA, Raimundo N, MacDuff DA, Kaech SM, Smiley**  
748 **JR, Means RE, Iwasaki A, Shadel GS.** 2015. Mitochondrial DNA stress  
749 primes the antiviral innate immune response. *Nature* **520**:553-557.
- 750 35. **Rongvaux A, Jackson R, Harman CCD, Li T, West AP, de Zoete MR, Wu**  
751 **Y, Yordy B, Lakhani SA, Kuan C-Y, Taniguchi T, Shadel GS, Chen ZJ,**  
752 **Iwasaki A, Flavell RA.** 2014. Apoptotic caspases prevent the induction of  
753 type I interferons by mitochondrial DNA. *Cell* **159**:1563-1577.
- 754 36. **Sun B, Sundström KB, Chew JJ, Bist P, Gan ES, Tan HC, Goh KC,**  
755 **Chawla T, Tang CK, Ooi EE.** 2017. Dengue virus activates cGAS through  
756 the release of mitochondrial DNA. *Scientific Reports* **7**:3594.
- 757 37. **Lau L, Gray EE, Brunette RL, Stetson DB.** 2015. DNA tumor virus  
758 oncogenes antagonize the cGAS-STING DNA-sensing pathway. *Science*  
759 **350**:568-571.
- 760 38. **Coulon P, Deutsch V, Lafay F, Martinet-Edelist C, Wyers F, Herman RC,**  
761 **Flamand A.** 1990. Genetic evidence for multiple functions of the matrix  
762 protein of vesicular stomatitis virus. *J Gen Virol* **71 ( Pt 4)**:991-996.
- 763 39. **Li L, Yin Q, Kuss P, Maliga Z, Millan JL, Wu H, Mitchison TJ.** 2014.  
764 Hydrolysis of 2'3'-cGAMP by ENPP1 and design of nonhydrolyzable analogs.  
765 *Nature Chemical Biology* **10**:1043-1048.



- 766 40. **Aguirre S, Luthra P, Sanchez-Aparicio MT, Maestre AM, Patel J,**  
767 **Lamothe F, Fredericks AC, Tripathi S, Zhu T, Pintado-Silva J, Webb LG,**  
768 **Bernal-Rubio D, Solovyov A, Greenbaum B, Simon V, Basler CF, Mulder**  
769 **LC, Garcia-Sastre A, Fernandez-Sesma A.** 2017. Dengue virus NS2B  
770 protein targets cGAS for degradation and prevents mitochondrial DNA  
771 sensing during infection. *Nat Microbiol* **2**:17037.
- 772 41. **Kukat A, Kukat C, Brocher J, Schäfer I, Krohne G, Trounce IA, Villani G,**  
773 **Seibel P.** 2008. Generation of  $\rho(0)$  cells utilizing a mitochondrially targeted  
774 restriction endonuclease and comparative analyses. *Nucleic Acids Research*  
775 **36**:e44-e44.
- 776 42. **Shimizu A, Nakatani Y, Nakamura T, Jinno-Oue A, Ishikawa O, Boeke**  
777 **JD, Takeuchi Y, Hoshino H.** 2014. Characterisation of cytoplasmic DNA  
778 complementary to non-retroviral RNA viruses in human cells. *Scientific*  
779 *Reports* **4**:5074.
- 780 43. **Black BL, Lyles DS.** 1992. Vesicular Stomatitis Virus Matrix Protein Inhibits  
781 Host Cell-Directed Transcription of Target Genes In Vivo. *J Virol*  
782 **66**:4058-4064.
- 783 44. **Black BL, Brewer G, Lyles DS.** 1994. Effect of vesicular stomatitis virus  
784 matrix protein on host-directed translation in vivo. *Journal of Virology*  
785 **68**:555-560.
- 786 45. **Chiu YH, MacMillan JB, Chen ZJ.** 2009. RNA Polymerase III Detects  
787 Cytosolic DNA and Induces Type I Interferons through the RIG-I Pathway.  
788 *Cell* **138**:576-591.
- 789 46. **Ablasser A, Bauernfeind F, Hartmann G, Latz E, Fitzgerald KA, Hornung**  
790 **V.** 2009. RIG-I-dependent sensing of poly(dA:dT) through the induction of an  
791 RNA polymerase III-transcribed RNA intermediate. *Nature Immunology*  
792 **10**:1065.

- 793 47. **Zhong B, Yang Y, Li S, Wang Y-Y, Li Y, Diao F, Lei C, He X, Zhang L, Tien**  
794 **P, Shu H-B.** 2008. The Adaptor Protein MITA Links Virus-Sensing Receptors  
795 to IRF3 Transcription Factor Activation. *Immunity* **29**:538-550.
- 796 48. **Castanier C, Garcin D, Vazquez A, Arnoult D.** 2010. Mitochondrial  
797 dynamics regulate the RIG-I-like receptor antiviral pathway. *EMBO Rep*  
798 **11**:133-138.
- 799 49. **Horner SM, Liu HM, Park HS, Briley J, Gale M.** 2011.  
800 Mitochondrial-associated endoplasmic reticulum membranes (MAM) form  
801 innate immune synapses and are targeted by hepatitis C virus. *Proceedings*  
802 *of the National Academy of Sciences* **108**:14590-14595.
- 803 50. **Schoggins JW, MacDuff DA, Imanaka N, Gainey MD, Shrestha B, Eitson**  
804 **JL, Mar KB, Richardson RB, Ratushny AV, Litvak V, Dabelic R,**  
805 **Manicassamy B, Aitchison JD, Aderem A, Elliott RM, Garcia-Sastre A,**  
806 **Racaniello V, Snijder EJ, Yokoyama WM, Diamond MS, Virgin HW, Rice**  
807 **CM.** 2014. Pan-viral specificity of IFN-induced genes reveals new roles for  
808 cGAS in innate immunity. *Nature* **505**:691-695.
- 809 51. **Liu Y, Liu Y, Wu J, Roizman B, Zhou GG.** 2018. Innate responses to gene  
810 knockouts impact overlapping gene networks and vary with respect to  
811 resistance to viral infection. *Proceedings of the National Academy of*  
812 *Sciences* **115**:E3230.
- 813 52. **Schoggins JW, Wilson SJ, Panis M, Murphy MY, Jones CT, Bieniasz P,**  
814 **Rice CM.** 2011. A diverse range of gene products are effectors of the type I  
815 interferon antiviral response. *Nature* **472**:481-485.
- 816 53. **Paijo J, Döring M, Spanier J, Grabski E, Nooruzzaman M, Schmidt T,**  
817 **Witte G, Messerle M, Hornung V, Kaefer V, Kalinke U.** 2016. cGAS  
818 Senses Human Cytomegalovirus and Induces Type I Interferon Responses in  
819 Human Monocyte-Derived Cells. *PLoS Pathogens* **12**:e1005546.
- 820 54. **Riley JS, Quarato G, Cloix C, Lopez J, Prey J, Pearson M, Chapman J,**  
821 **Sesaki H, Carlin LM, Passos JF, Wheeler AP, Oberst A, Ryan KM, Tait**

- 822 **SWG**. 2018. Mitochondrial inner membrane permeabilisation enables mtDNA  
823 release during apoptosis. *The EMBO Journal*.
- 824 55. **McArthur K, Whitehead LW, Heddleston JM, Li L, Padman BS, Oorschot**  
825 **V, Geoghegan ND, Chappaz S, Davidson S, San Chin H, Lane RM,**  
826 **Dramicanin M, Saunders TL, Sugiana C, Lessene R, Osellame LD, Chew**  
827 **T-L, Dewson G, Lazarou M, Ramm G, Lessene G, Ryan MT, Rogers KL,**  
828 **van Delft MF, Kile BT**. 2018. BAK/BAX macropores facilitate mitochondrial  
829 herniation and mtDNA efflux during apoptosis. *Science* **359**.
- 830 56. **Yang Y-G, Lindahl T, Barnes DE**. 2007. Trex1 exonuclease degrades  
831 ssDNA to prevent chronic checkpoint activation and autoimmune disease.  
832 *Cell* **131**:873-886.
- 833 57. **Gray EE, Treuting PM, Woodward JJ, Stetson DB**. 2015. Cutting Edge:  
834 cGAS Is Required for Lethal Autoimmune Disease in the Trex1-Deficient  
835 Mouse Model of Aicardi-Goutieres Syndrome. *J Immunol* **195**:1939-1943.
- 836 58. **Cheng J, Liao Y, Zhou L, Peng S, Chen H, Yuan Z**. 2016. Amplified RLR  
837 signaling activation through an interferon-stimulated gene-endoplasmic  
838 reticulum stress-mitochondrial calcium uniporter protein loop. *Scientific*  
839 *Reports* **6**:20158.
- 840 59. **Gopinath S, Kim MV, Rakib T, Wong PW, van Zandt M, Barry NA, Kaisho**  
841 **T, Goodman AL, Iwasaki A**. 2018. Topical application of aminoglycoside  
842 antibiotics enhances host resistance to viral infections in a  
843 microbiota-independent manner. *Nature Microbiology* **3**:611-621.
- 844 60. **Prigge JR, Hoyt TR, Dobrinen E, Capecchi MR, Schmidt EE, Meissner N**.  
845 2015. Type I IFNs Act upon Hematopoietic Progenitors To Protect and  
846 Maintain Hematopoiesis during Pneumocystis Lung Infection in Mice. *J*  
847 *Immunol* **195**:5347-5357.
- 848 61. **Honda K, Yanai H, Negishi H, Asagiri M, Sato M, Mizutani T, Shimada N,**  
849 **Ohba Y, Takaoka A, Yoshida N, Taniguchi T**. 2005. IRF-7 is the master

- 850 regulator of type-I interferon-dependent immune responses. *Nature*  
851 **434:772-777.**
- 852 62. **Sun Q, Sun L, Liu HH, Chen X, Seth RB, Forman J, Chen ZJ.** 2006. The  
853 specific and essential role of MAVS in antiviral innate immune responses.  
854 *Immunity* **24:633-642.**
- 855 63. **Ye J.** 2007. Reliance of host cholesterol metabolic pathways for the life cycle  
856 of hepatitis C virus. *PLoS Pathog* **3:e108.**
- 857 64. **Ramsburg E, Publicover J, Buonocore L, Poholek A, Robek M, Palin A,**  
858 **Rose JK.** 2005. A vesicular stomatitis virus recombinant expressing  
859 granulocyte-macrophage colony-stimulating factor induces enhanced T-cell  
860 responses and is highly attenuated for replication in animals. *J Virol*  
861 **79:15043-15053.**
- 862 65. **van den Pol AN, Davis JN.** 2013. Highly attenuated recombinant vesicular  
863 stomatitis virus VSV-12'GFP displays immunogenic and oncolytic activity. *J*  
864 *Virol* **87:1019-1034.**
- 865 66. **Suthar MS.** 2007. Molecular pathogenesis of the sindbis-group virus strain  
866 ar86. Ph.D. University of North Carolina at Chapel Hill, Chapel Hill, NC.
- 867 67. **Desai P, Person S.** 1998. Incorporation of the green fluorescent protein into  
868 the herpes simplex virus type 1 capsid. *J Virol* **72:7563-7568.**
- 869 68. **Lam SS, Martell JD, Kamer KJ, Deerinck TJ, Ellisman MH, Mootha VK,**  
870 **Ting AY.** 2015. Directed evolution of APEX2 for electron microscopy and  
871 proximity labeling. *Nat Methods* **12:51-54.**
- 872 69. **Guan B, Wang TL, Shih le M.** 2011. ARID1A, a factor that promotes  
873 formation of SWI/SNF-mediated chromatin remodeling, is a tumor suppressor  
874 in gynecologic cancers. *Cancer Res* **71:6718-6727.**
- 875 70. **Zheng L, Baumann U, Reymond JL.** 2004. An efficient one-step  
876 site-directed and site-saturation mutagenesis protocol. *Nucleic Acids Res*  
877 **32:e115.**

- 878 71. **Wang T, Wei JJ, Sabatini DM, Lander ES.** 2014. Genetic screens in human  
879 cells using the CRISPR-Cas9 system. *Science* **343**:80-84.
- 880 72. **Doench JG, Hartenian E, Graham DB, Tothova Z, Hegde M, Smith I,**  
881 **Sullender M, Ebert BL, Xavier RJ, Root DE.** 2014. Rational design of highly  
882 active sgRNAs for CRISPR-Cas9-mediated gene inactivation. *Nat Biotechnol*  
883 **32**:1262-1267.
- 884 73. **Shalem O, Sanjana NE, Hartenian E, Shi X, Scott DA, Mikkelsen TS,**  
885 **Heckl D, Ebert BL, Root DE, Doench JG, Zhang F.** 2014. Genome-scale  
886 CRISPR-Cas9 knockout screening in human cells. *Science* **343**:84-87.
- 887 74. **Rueden CT, Schindelin J, Hiner MC, DeZonia BE, Walter AE, Arena ET,**  
888 **Eliceiri KW.** 2017. ImageJ2: ImageJ for the next generation of scientific  
889 image data. *BMC Bioinformatics* **18**:529.
- 890 75. **Li H, Durbin R.** 2010. Fast and accurate long-read alignment with  
891 Burrows-Wheeler transform. *Bioinformatics* **26**:589-595.
- 892 76. **Trapnell C, Pachter L, Salzberg SL.** 2009. TopHat: discovering splice  
893 junctions with RNA-Seq. *Bioinformatics* **25**:1105-1111.
- 894 77. **Freese NH, Norris DC, Loraine AE.** 2016. Integrated genome browser:  
895 visual analytics platform for genomics. *Bioinformatics* **32**:2089-2095.
- 896  
897

898 **Figure Legends**

899 **Figure 1. WT cGAS and hcGAS restrict RNA virus infection in immortalized**  
900 **MEFs.** Single-step growth curve of (A) VSV-GFP and (B) SINV-GFP production from  
901 MEFs infected at MOI 3, as assessed by plaque assay on SW13 cells. (C) VSV-GFP  
902 stocks were titered by plaque assay on WT, KO, and KO+WT cells.

903

904 **Figure 2. hcGAS-HA3x variants display differential restriction of RNA virus**  
905 **infection.** (A) The structure of hcGAS (grey) in complex with ATP (pink) and DNA  
906 (yellow-purple), as rendered from PDB 6CTA; residues K384 (blue), K407 (green),  
907 and E225/D227 (orange) are shown. (B) Plaque assay of VSV-GFP produced by  
908 SV40 T-immortalized MEF KO cells reconstituted with hcGAS-HA3x variants and  
909 infected (MOI 3) for 8 hours; western blot of hcGAS expression is shown below.

910

911 **Figure 3. hcGAS variants display differential restriction of RNA virus infection.**  
912 Primary KO MEFs were transduced to express hcGAS variants with lentiviral vectors  
913 and infected with (A) VSV-GFP, (B) VSV $\Delta$ M51A-GFP, or (C) SINV-GFP; % infected  
914 cells was determined by flow cytometry in relation to empty vector-transduced KO  
915 MEFs (Empty). WT THP-1, THP-1 cGAS knockout (KO), and THP-1 cGAS KO cells  
916 reconstituted with WT (+WT) mutant forms of hcGAS (K384E, K407E, or E/D) were  
917 differentiated with PMA and infected with (D) VSV-GFP, (E) VSV $\Delta$ M51A-GFP, or (F)  
918 SINV-GFP; % infected cells was determined by flow cytometry in relation to THP-1  
919 KO cells.

920

921 **Figure 4. VSV-GFP infection does not induce detectable cGAMP production.**  
922 (A) UHPLC profiles showing a time-course of cGAMP production after transfecting  
923 salmon sperm DNA into hcGAS-3xHA-expressing HEK 293E cells. The yellow box  
924 represents the peak elution range of synthetic cGAMP observed in pilot  
925 experiments. (B) Mass chromatogram of the eluted cGAMP peak after transfecting  
926 DNA hcGAS-3xHA-expressing HEK 293E cells. Known ionization products of

927 cGAMP are highlighted in orange. (C) Diagram of cGAMP indicating predicted  
928 fragmentation pattern from MS data of cell-derived cGAMP; for reference a mass  
929 chromatogram obtained from synthetic cGAMP (Invivogen) is shown. (D) UHPLC  
930 profiles of untreated, VSV infected, or DNA transfected HEK293E cells expressing  
931 WT or catalytically inactive hcGAMP-3xHA. (E) Standard curve of extracted ion  
932 currents vs. synthetic cGAMP input. (F) Workflow of the cGAMP bioassay, see text  
933 for details. (G) cGAMP-mediated IRF3 phosphorylation is dependent on STING.  
934 WT or STING KO THP-1 were transfected with cGAMP, DNA, or left untransfected;  
935 TF Controls received transfection reagent but no DNA. pIRF3, STING, and  $\beta$ -actin  
936 were detected by western blot. (H) Standard curve of pIRF3 detection vs. synthetic  
937 cGAMP input; L.O.D., limit of detection. (I) cGAMP was not detected during RNA  
938 virus infections. WT THP-1 or cGAS KO cells expressing the indicated forms of  
939 hcGAS-HA3x were infected with VSV-GFP or SINV-GFP at MOI 3 for 5 hours. Data  
940 are representative of multiple experiments performed at various scales and lengths  
941 of infection. (J) Time-course of cGAMP formation after transfecting DNA into HEK  
942 293E cells expressing hcGAS-HA3x. (K) Time-course of cGAMP activity in whole  
943 cell lysates of HEK 293E cells transfected with cGAMP.

944

945 **Figure 5. VSV infection does not introduce cGAS DNA ligands.** (A) Isolation of  
946 cGAS-bound mtDNA. The amount of mtDNA D-loop sequence was quantitated by  
947 qPCR after HA-immunoprecipitation from MEF cGAS KO cells reconstituted with WT  
948 hcGAS-HA3x or the K384E DNA binding mutant. The No Ab control was from WT  
949 cells. This experiment was repeated many times at different scales, with similar  
950 cGAS-specific enrichment of mtDNA. (B) The mtDNA content of VSV-GFP-infected  
951 and uninfected MEFs was assessed by D-loop qPCR. (C) Western blotting of  
952 organelle/compartments-specific proteins in MEF WT total and cytosolic fractions with  
953 25 $\mu$ g/mL digitonin extraction. (D) Total amounts of mtDNA (Dloop and CytB) and  
954 cellular DNA ( $\beta$ -gluc) were determined by qPCR in uninfected and  
955 VSV-GFP-infected MEF cells. (E) The mtDNA content was determined in cytosolic



956 extracts from uninfected and VSV-GFP-infected MEF cells. (F) Deep sequencing of  
957 cytosolic extracts from uninfected and VSV-GFP-infected MEFs revealed the  
958 presence of mtDNA. (G) Deep sequencing of cGAS-immunoprecipitates from  
959 uninfected and VSV-GFP-infected reveal abundant mtDNA. (H) Time course of  
960 VSV-GFP infection in LMTK and LMTK  $\rho^0$  cells; cGAS and STING expression were  
961 confirmed by western blot (inset). (I) Detection of VSV cDNA in virus-infected cells. N  
962 gene-specific primers and probes were used to quantitate VSV cDNAs. GAPDH was  
963 used as a control for cellular target DNA. (J) VSV cDNAs are sensitive to DNase I.  
964 Cytosolic extracts were incubated with the indicated nucleases, cleaned up, and  
965 subjected to qPCR. (K) Detection of GAPDH cDNA. Total cellular DNA was  
966 subjected to qPCR with genomic DNA (gDNA)- and splice dependent  
967 (cDNA)-specific primer and probe sets.

968

969 **Figure 6. cGAS primes basal ISG expression in steady state cell cultures.**

970 ISRE-driven luciferase production in (A) uninfected, (B) VSV-GFP infected, and (C)  
971 and SINV-GFP infected THP-1 KO cells lines with or without WT or mutant  
972 hcGAS-3xHA expression. RT-qPCR of (D) MX1, (E) IFIT1, and (F) CXCL10  
973 expression in uninfected WT THP-1, THP-1 KO, or THP-1 KO cells expressing WT  
974 or mutant hcGAS-HA3x.

975

976 **Figure 7. cGAS primes basal ISG expression *in vivo*.** Vaginal tissue was  
977 collected from uninfected female mice of the indicated genotypes, synchronized in  
978 diestrus. Expression levels of USP18, Mx1, and Rsad2 were quantitated by  
979 RT-qPCR and normalized to B6J mice.

980

981 **Figure 8. Model of cGAS-mediated restriction of RNA virus infection.**

982

983 **Figure S1. hcGAS recoding, gRNA binding site, and residues targeted for**  
984 **mutations.** Site-directed mutagenesis was utilized to generate three mutants

985 (brown). The K384E and K407E mutations disrupt the DNA-binding ability of the  
986 cGAS, while the E225A/D227A mutation ablates cGAMP catalytic activity. The 5'  
987 518-bp of hcGAS were codon optimized (red) to improve expression and to generate  
988 a sequence resistant to CRISPR/Cas9 targeting. The gRNA binding site (blue) was  
989 modified at 8 residues.

990

991 **Figure S2. hcGAS KO in THP-1 cells and reconstitution with hcGAS-HA3x.**

992 Western blotting of (A) a dilution curve of THP-1 WT lysate inputs and (B) lysates of  
993 THP-1 WT and hcGAS KO cells reconstituted with hcGAS. (C) Standard curve  
994 generated from a dilution series of the lysate used in (A). (D) Calculation of relative  
995 hcGAS expression levels in (B) as compared to the THP-1 WT sample by using the  
996 standard curve in (C).

997

998 **Fig. S3. Detection of viral cDNAs.** (A) Time-course of VSV growth and cDNA

999 formation in HEK-293T cells treated with tenofovir and infected with VSV-GFP (MOI  
1000 3). Tenofovir (1  $\mu$ M), which was added one hour prior to infection and maintained  
1001 throughout the time-course, had no effect on VSV replication. (B) Accumulation of  
1002 VSV N-gene cDNA in WT HEK 293 cells or HEK 293E cells ablated for TREX1 by  
1003 CRISPR/Cas9. This experiment was repeated once with similar results. (C)  
1004 Detection of YFV cDNA. Shown here is the standard curve used to estimate absolute  
1005 DNA copies via qPCR (left) and the quantity of viral cDNA detected in BHK-21 or  
1006 Huh-7.5 cells infected with YFV-17D (right). This experiment was repeated twice  
1007 with similar results.

1008

1009 **Table 1. Oligonucleotide primers and probes used in these studies**

| Name    | Use*          | Sequence (5' - to -3')                                      | U <sup>^</sup> |
|---------|---------------|-------------------------------------------------------------|----------------|
| YO-1485 | hIFIT1 F      | agaacggctgcctaatttacag                                      | 9              |
| YO-1486 | hIFIT1 R      | gctccagactatccttgacctg                                      | 9              |
| YO-1659 | hSTING gRNA F | caccgggttctgctgagtgacctgcc                                  |                |
| YO-1660 | hSTING gRNA R | aaacggcaggcactcagcagaaccc                                   |                |
| YO-1665 | hTREX1 gRNA F | caccggcagtggtgtgacagcaga                                    |                |
| YO-1666 | hTREX1 gRNA R | aaactctgctgcacaaccactgcc                                    |                |
| YO-1925 | YFV NS1 F     | gggtaagaacctgtgttctcc                                       | 69             |
| YO-1926 | YFV NS1 R     | ggcattcttctcggactttc                                        | 69             |
| YO-1936 | VSV N F       | tgacaacacagtcgtagtcca                                       | 4              |
| YO-1937 | VSV N R       | aatctgccgggtattccact                                        | 4              |
| YO-2017 | hD-loop F     | ctcagataggggtcccttga                                        | 88             |
| YO-2018 | hD-loop R     | gcactctgtgcgggatatt                                         | 88             |
| YO-2037 | hGAPDH F      | ccccggttctataaattgagc                                       | 63             |
| YO-2038 | hGAPDH R      | tttctctccgccctctt                                           | 63             |
| YO-2039 | hGAPDH cDNA F | ctctctgctcctcctgttcg                                        | 60             |
| YO-2040 | hGAPDH cDNA R | accaaaccggtgactccga                                         | 60             |
| YO-2041 | hβGluc F      | tgtgtctgcagtggtgaat                                         | 77             |
| YO-2043 | hβGluc R      | ggtattggatggtccctggt                                        | 77             |
| YO-2115 | mGAPDH F      | cagttgtccaattgttctagg                                       | 77             |
| YO-2116 | mGAPDH R      | ttactcctggaggccatgt                                         | 77             |
| YO-2119 | mD-loop F     | catcaacatagccgtcaagg                                        | 56             |
| YO-2120 | mD-loop R     | tgggttttgcggactaatg                                         | 56             |
| YO-2142 | hcGAS-HA F    | taagcactcgagatgcagccttggcacgaaag                            |                |
| YO-2143 | hcGAS-HA R    | tgcttagcggccgcttaggcatagtctggcacatc                         |                |
| YO-2144 | K384E F       | gctatccttctcacatcgaagaggaaatttgaacaatcatgg                  |                |
| YO-2145 | K384E R       | ccatgattgtcaaaattctctctcatgtgagagaaggatagc                  |                |
| YO-2146 | K407E F       | gaaaacaaagaagagaaatgttcagggagattgttaaaactaatgaaatacc        |                |
| YO-2147 | K407E R       | ggtatttcattagttaaacaatctccctgcacatttctcttcttcttctt          |                |
| YO-2148 | E225A/D227A F | gcacgtgaagatttctgcacctaatgcatttctgtcatgtttaaactggaagtccccag |                |
| YO-2149 | E225A/D227A R | ctggggactccagtttaaacatgacagcaaatgcattaggtgcagaaatcttcacgtgc |                |
| YO-2269 | cGAS gRNA F   | caccggaatgccaggggcccgcga                                    |                |
| YO-2270 | cGAS gRNA R   | aaactcggggcggccctggcattcc                                   |                |
| YO-2660 | hCXCL10 F     | gaaagcagttagcaaggaaaggt                                     | 34             |
| YO-2661 | hCXCL10 R     | gacataatacctatgtagggaagtga                                  | 34             |
| YO-2772 | Bsd F         | taagcaccatggccaagccttctgtca                                 |                |
| YO-2773 | Bsd R         | tgcttagtcgacttagccctcccacacataac                            |                |
| YO-2830 | hMx1 F        | accacagaggctctcagcat                                        | 10             |
| YO-2831 | hMx1 R        | cagatcaggcttcgcaaga                                         | 10             |
| YO-2834 | hIL-1β F      | tacctgtcctgcgtgtgaa                                         | 78             |
| YO-2835 | hIL-1β R      | tcttgggtaattttgggatct                                       | 78             |
| mHprtF  | mHprt F       | gttgatacaggccagactttgttg                                    |                |

|         |          |                         |
|---------|----------|-------------------------|
| mHprtR  | mHprt R  | gagggtaggctggcctattggct |
| mUsp18F | mUsp18 F | cgtgcttgagagggtcatttg   |
| mUsp18R | mUsp18 R | ggccggagtccacaacttc     |
| mMx1F   | mMx1 F   | ccaactggaatcctcctggaa   |
| mMx1R   | mMx1 R   | gccgcaccttctcctcatag    |
| mRsad2F | mRsad2 F | aacaggctggttggagaag     |
| mRsad2R | mRsad2 R | tgccattgctcactatgctc    |

---

1010 \*h, *Homo sapiens*; m, *Mus musculus*; F, forward; R, reverse

1011 ^U, Universal probe library

1012

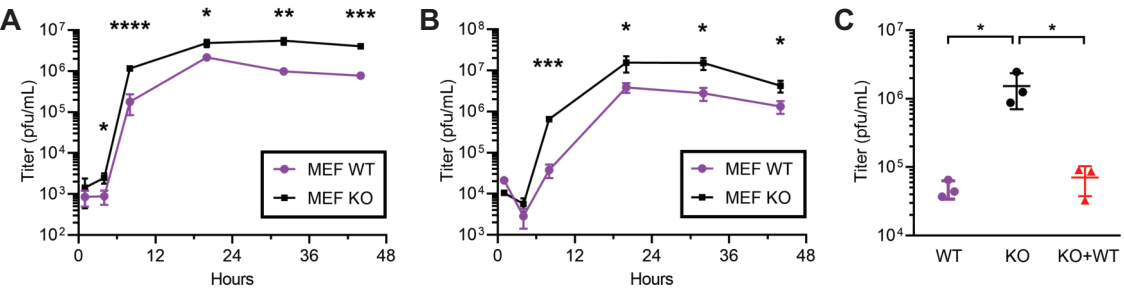

Figure 1

**A**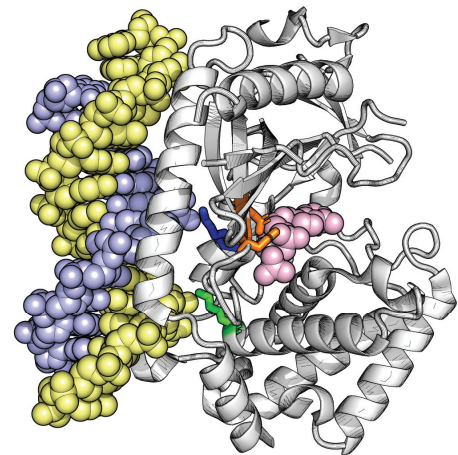**B**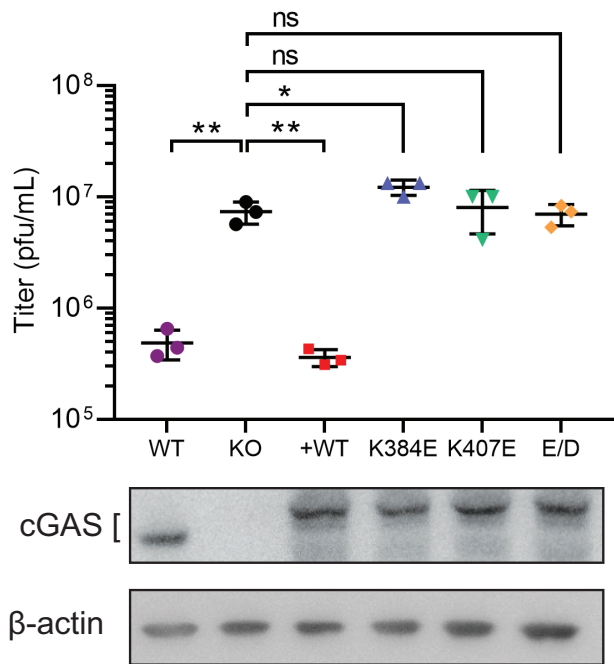

Figure 2

**A** VSV-GFP in primary MEFs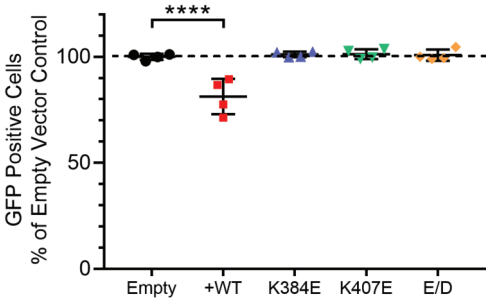**B** VSV $\Delta$ M51A-GFP in primary MEFs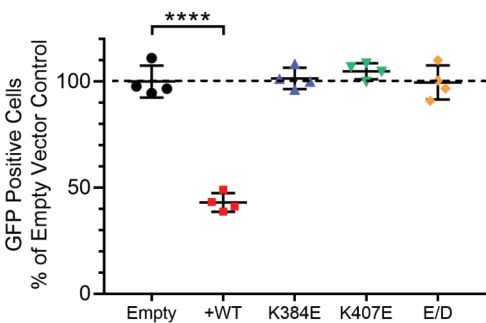**C** SINV-GFP in primary MEFs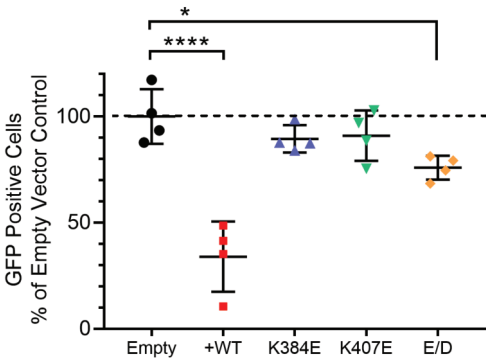**D** VSV-GFP in THP-1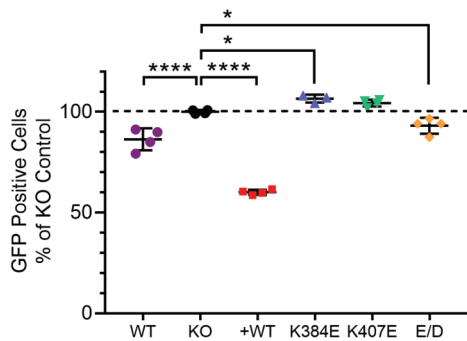**E** VSV $\Delta$ M51A-GFP in THP-1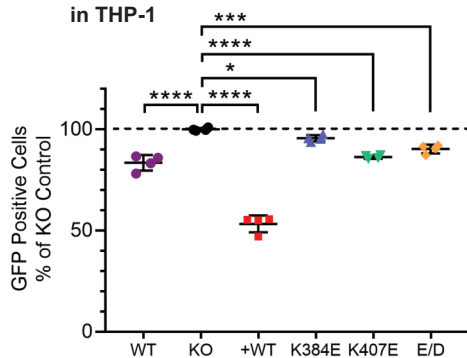**F** SINV-GFP in THP-1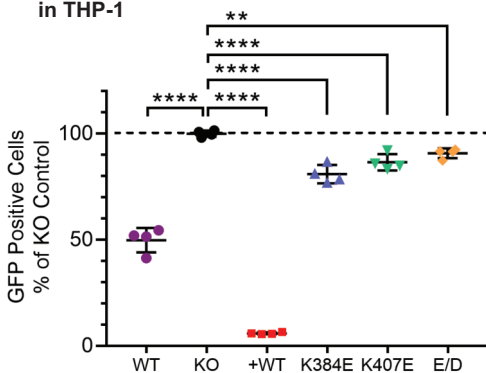

Figure 3



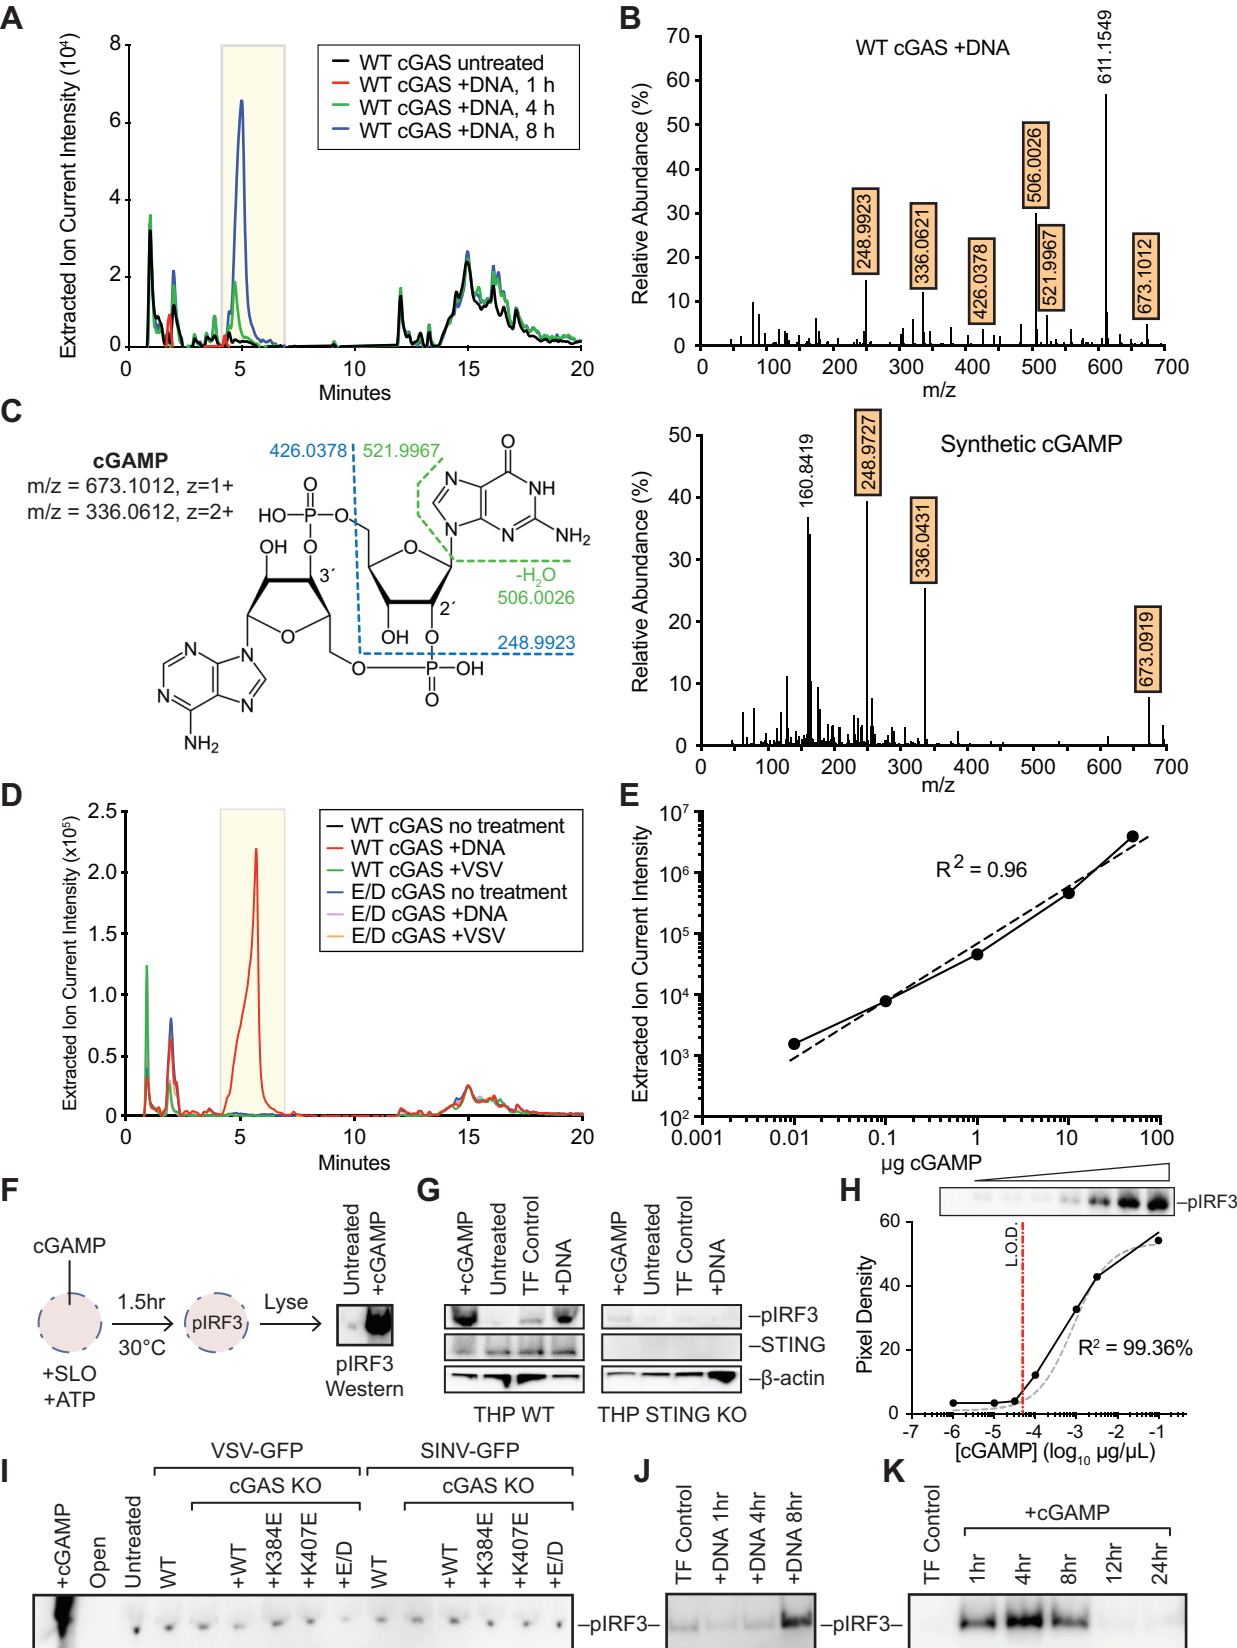

Figure 4

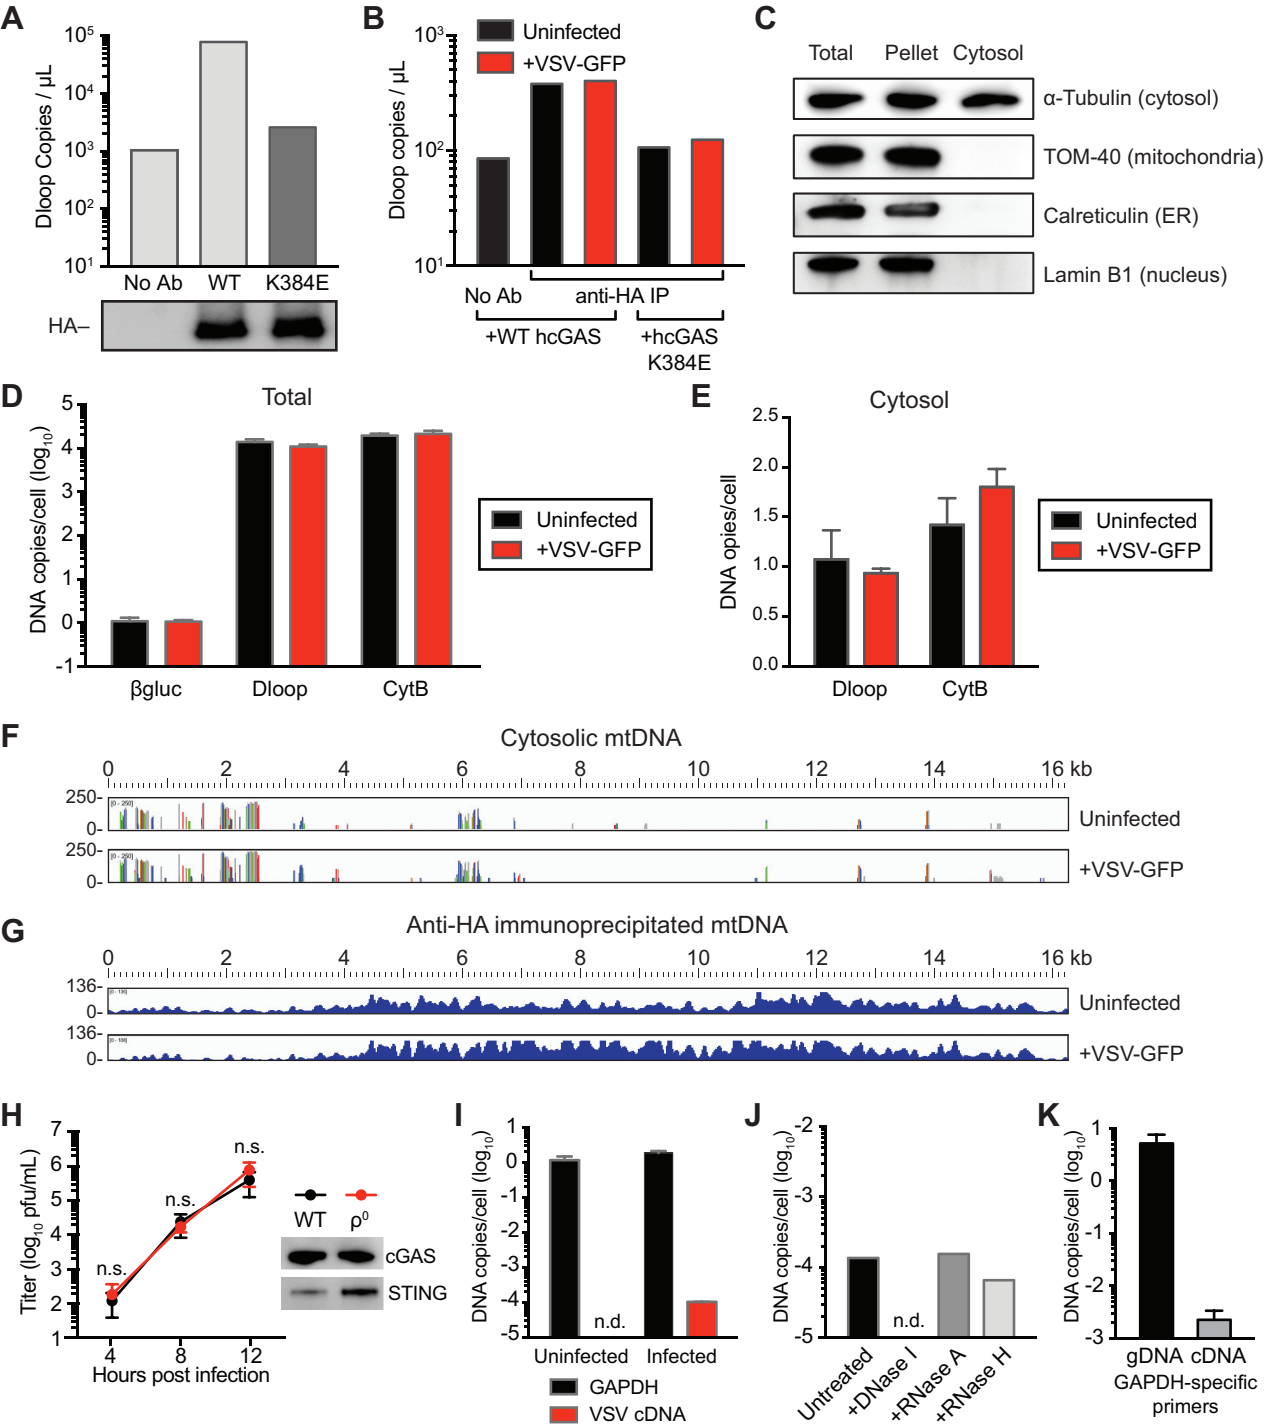

Figure 5

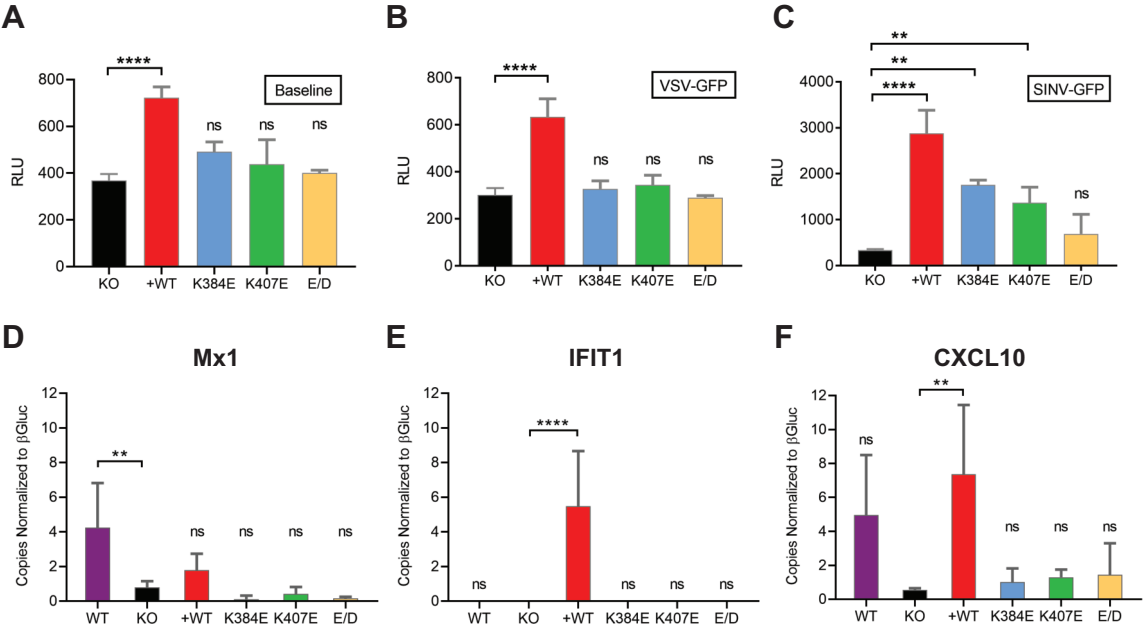

Figure 6

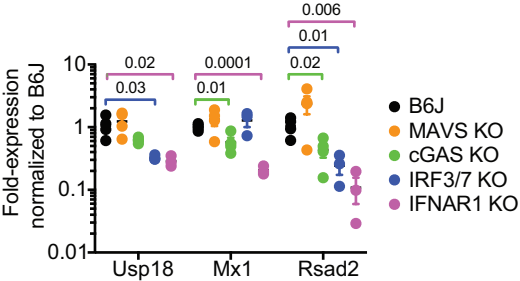

Figure 7

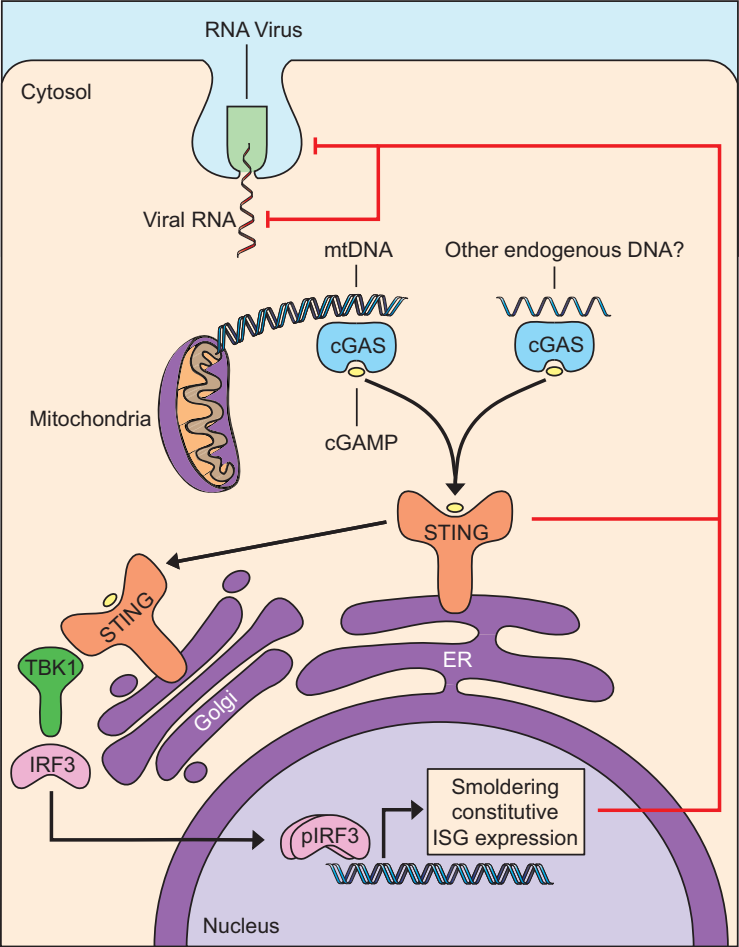

Figure 8
